# Supplementary material for: Brief communication: Alternation of thaw zones and deep permafrost in the cold climate conditions of the East Siberian Mountains, Suntar-Khayata Range
Source: Copernicus journal article supplement (doi:10.5194/egusphere-2023-49), 2023-03-20
Supplement: Supplementary file 1 [file egusphere-2023-49-supplement.pdf]

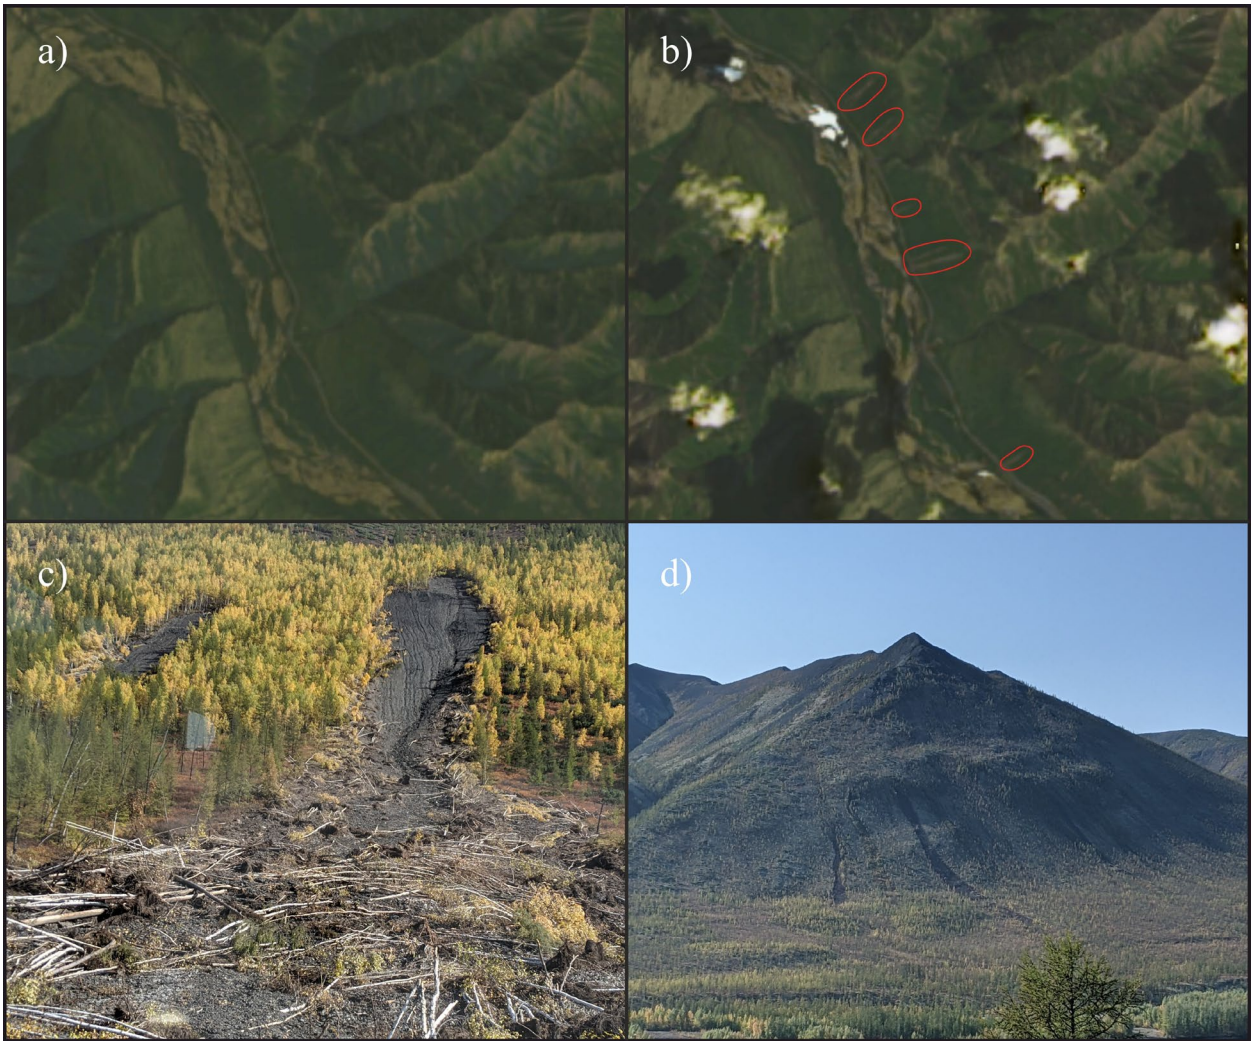

1

2 **Figure S1: The MAXAR image of Kolyma Route section before landslides caused to heavy rains in 2020 (a) and after in**  
3 **2022 (b). Field observation of debris landslides (c) the souths aspect slope and (d) the north aspect slope.**

4
