# Supplementary material for: Brief communication: Alternation of thaw zones and deep permafrost in the cold climate conditions of the East Siberian Mountains, Suntar-Khayata Range
Source: Copernicus journal article supplement (doi:10.5194/egusphere-2023-49), 2023-03-20
Supplement: Supplementary file [file egusphere-2023-49-RC1-supplement.pdf]

|         |        |               |                              |                |               |          |         |           |      |       |      |      |                                   |
|---------|--------|---------------|------------------------------|----------------|---------------|----------|---------|-----------|------|-------|------|------|-----------------------------------|
| tsp.211 | Russia | Vorkuta       | 211 Vorkuta R-83             | RU 134 10_0038 | Continuous    | 62,3371  | 67,3379 | 90        | 20   | true  | 2000 | 2013 | 83 Naum G. Oberman                |
| tsp.213 | Russia | Cherskii      | 213 Chukochya River 14_79    | RU 71 06_0018  | Continuous    | 156,9878 | 69,4834 | 24,9164   | 15   | true  | 2007 | 2013 | 79 Alexander L. Kholodov          |
| tsp.214 | Russia | Kytalyk       | 214 Kytalyk 2_04             | RU 60 06_0006  | Continuous    | 147,4423 | 72,026  | 24,8702   | 8    | true  | 2000 | 2013 | 79 Alexander L. Kholodov          |
| tsp.215 | Russia | Cherskii      | 215 Omolon river mouth 2_07* | RU 66 06_0013  | Continuous    | 158,9074 | 68,7255 | 8,6473    | 25   | true  | 2005 | 2009 | 79 Alexander L. Kholodov          |
| tsp.216 | Russia | Cherskii      | 216 Duvanny Yar 2_08*        | RU 70 06_0017  | Continuous    | 159,0788 | 68,6334 | 25,9774   | 25   | true  | 2008 | 2012 | 79 Alexander L. Kholodov          |
| tsp.217 | Russia | Chara         | 217 Chara 38                 | RU 45 04_0002  | Continuous    | 118,3608 | 56,6669 | 1446,0494 | 19   | true  | 2006 | 2019 | 14 Dmitry Sergueev                |
| tsp.218 | Russia | Kytalyk       | 218 Kytalik 4_06             | RU 58 06_0004  | Continuous    | 147,0208 | 72,2423 | 25        | 20   | true  | 2000 | 2013 | 79 Alexander L. Kholodov          |
| tsp.219 | Russia | Cherskii      | 219 Amboliha 4_07*           | RU 67 06_0014  | Continuous    | 161,392  | 68,6389 | 3,1548    | 24   | true  | 2005 | 2009 | 79 Alexander L. Kholodov          |
| tsp.220 | Russia | Chara         | 220 Chara 41                 |                | Continuous    | 118,3696 | 56,6741 | 1324,7367 | 20   | true  | 2012 | 2018 | 14 Dmitry Sergueev                |
| tsp.221 | Russia | Kytalyk       | 221 Kytalik 5_06*            | RU 59 06_0005  | Continuous    | 147,4423 | 70,5603 | 38,2683   | 15   | true  | 2007 | 2013 | 79 Alexander L. Kholodov          |
| tsp.222 | Russia | Cherskii      | 222 Ahmelo lake 5_07*        | RU 68 06_0015  | Continuous    | 160,9884 | 68,8122 | 4,1175    | 15   | true  | 2000 | 2013 | 79 Alexander L. Kholodov          |
| tsp.223 | Russia | Chara         | 223 Chara 6                  | RU 44 04_0001  | Continuous    | 118,4263 | 56,6056 | 1710,5636 | 20   | true  | 2006 | 2010 | 14 Dmitry Sergueev                |
| tsp.224 | Russia | Chara         | 224 Belenkiy-1               | RU 49 04_0007  | Discontinuous | 118,1896 | 56,761  | 724,9174  | 1,3  | true  | 2007 | 2018 | 14 Dmitry Sergueev                |
| tsp.225 | Russia | Chara         | 225 Most-1                   | RU 54 04_0012  | Discontinuous | 118,2813 | 56,9055 | 704,2776  | 20   | true  | 1990 | 2022 | 14 Dmitry Sergueev                |
| tsp.226 | Russia | Chara         | 226 Peski-1                  | RU 50 04_0008  | Discontinuous | 118,1732 | 56,8614 | 755,1892  | 15,3 | true  | 2007 | 2020 | 14 Dmitry Sergueev                |
| tsp.227 | Russia | Chara         | 227 Ushelistiy-1             | RU 51 04_0009  | Continuous    | 118,4807 | 56,5442 | 1647,9132 | 0,45 | true  | 2008 | 2022 | 14 Dmitry Sergueev                |
| tsp.228 | Russia | Chara         | 228 Zagryazkin-1             | RU 48 04_0006  | Continuous    | 118,3604 | 56,6776 | 1152,5042 | 19   | true  | 2005 | 2022 | 14 Dmitry Sergueev                |
| tsp.229 | Russia | Novyi Urengoy | 229 Urengoy 05-00            | 05-0           | Discontinuous | 76,93    | 66,3    | 56,1324   | 10   | true  | 2000 | 2013 | 75 Dmitry S. Drozdov              |
| tsp.231 | Russia | Cherskii      | 231 Cherskii R33*            | RU 61 06_0007  | Continuous    | 159,983  | 70,083  | 20        | 25   | true  | 2005 | 2009 | 80 Dmitry Fedorov-Davydov         |
| tsp.400 | Russia | Vorkuta       | 400 Vorkuta 106              | RU 123 10_0027 | Continuous    | 61,5205  | 67,9619 | 132,9547  | 8    | true  | 2007 | 2009 | 83 Naum G. Oberman                |
| tsp.401 | Russia | Vorkuta       | 401 Vorkuta 35               | RU 120 10_0024 | Continuous    | 61,4962  | 67,9622 | 144,6529  | 15   | true  | 2007 | 2010 | 83 Naum G. Oberman                |
| tsp.402 | Russia | Vorkuta       | 402 Vorkuta 37               | RU 121 10_0025 | Continuous    | 61,505   | 67,9573 | 130,0995  | 15   | true  | 2007 | 2010 | 83 Naum G. Oberman                |
| tsp.403 | Russia | Vorkuta       | 403 Vorkuta 100              | RU 122 10_0026 | Continuous    | 61,5007  | 67,9547 | 140,6116  | 16   | true  | 2007 | 2010 | 83 Naum G. Oberman                |
| tsp.404 | Russia | Vorkuta       | 404 Vorkuta KT-18            | RU 142 10_0048 | Continuous    | 62,4097  | 68,2384 | 95,6416   | 15   | false |      |      | 83 Naum G. Oberman                |
| tsp.405 | Russia | Vorkuta       | 405 Vorkuta KT-17            | RU 141 10_0047 | Continuous    | 62,4289  | 68,2439 | 87,1652   | 15   | false |      |      | 83 Naum G. Oberman                |
| tsp.406 | Russia | Vorkuta       | 406 Vorkuta KT-16a           | RU 140 10_0046 | Continuous    | 62,434   | 68,246  | 83,9354   | 15   | false |      |      | 83 Naum G. Oberman                |
| tsp.407 | Russia | Vorkuta       | 407 Vorkuta KT-14            | RU 145 10_0051 | Continuous    | 62,4609  | 68,2546 | 65,0924   | 9    | false |      |      | 83 Naum G. Oberman                |
| tsp.408 | Russia | Vorkuta       | 408 Vorkuta KT-8             | RU 139 10_0045 | Continuous    | 62,4792  | 68,2602 | 39        | 15   | false |      |      | 83 Naum G. Oberman                |
| tsp.409 | Russia | Vorkuta       | 409 Vorkuta KT-5             | RU 138 10_0044 | Continuous    | 62,4917  | 68,2643 | 50,0634   | 15   | false |      |      | 83 Naum G. Oberman                |
| tsp.410 | Russia | Vorkuta       | 410 Vorkuta KT-22            | RU 143 10_0049 | Continuous    | 62,4994  | 68,2705 | 47,6225   | 10   | false |      |      | 83 Naum G. Oberman                |
| tsp.411 | Russia | Vorkuta       | 411 Vorkuta KT-21            | RU 146 10_0052 | Continuous    | 62,515   | 68,2739 | 37,7444   | 22   | true  | 2009 | 2009 | 83 Naum G. Oberman                |
| tsp.412 | Russia | Vorkuta       | 412 Vorkuta KT-4             | RU 137 10_0043 | Continuous    | 62,5306  | 68,2781 | 21,736    | 12   | false |      |      | 83 Naum G. Oberman                |
| tsp.413 | Russia | Vorkuta       | 413 Vorkuta KT-38            | RU 136 10_0042 | Continuous    | 62,5426  | 68,2803 | 15,2697   | 25,6 | false |      |      | 138 Ivan Valentinovich Derevyanko |
| tsp.414 | Russia | Vorkuta       | 414 Vorkuta KT-27            | RU 144 10_0050 | Continuous    | 62,5875  | 68,2944 | 8,6677    | 5    | false |      |      | 83 Naum G. Oberman                |
| tsp.415 | Russia | Vorkuta       | 415 Vorkuta 34               | RU 127 10_0031 | Continuous    | 65,8106  | 68,262  | 152,3153  | 5    | false |      |      | 83 Naum G. Oberman                |
| tsp.416 | Russia | Vorkuta       | 416 Vorkuta 23               | RU 124 10_0028 | Continuous    | 65,8077  | 68,2563 | 158,0001  | 9    | false |      |      | 83 Naum G. Oberman                |
| tsp.417 | Russia | Vorkuta       | 417 Vorkuta 30               | RU 125 10_0029 | Continuous    | 65,8015  | 68,2571 | 153       | 7    | false |      |      | 83 Naum G. Oberman                |
| tsp.418 | Russia | Vorkuta       | 418 Vorkuta 32               | RU 126 10_0030 | Continuous    | 65,8019  | 68,2558 | 153       | 8    | false |      |      | 83 Naum G. Oberman                |
| tsp.419 | Russia | Novyi Urengoy | 419 Urengoy 05-01*           | RU 27 03_0028  | Discontinuous | 76,5408  | 66,1882 | 58        | 10   | true  | 1902 | 2012 | 75 Dmitry S. Drozdov              |
| tsp.420 | Russia | Novyi Urengoy | 420 Urengoy 05-03            | RU 26 03_0027  | Discontinuous | 76,5408  | 66,1873 | 59        | 10   | true  | 1974 | 2015 | 75 Dmitry S. Drozdov              |
| tsp.421 | Russia | Novyi Urengoy | 421 Urengoy 05-05            | RU 25 03_0021  | Discontinuous | 76,9066  | 66,3149 | 66,4254   | 10   | false |      |      | 75 Dmitry S. Drozdov              |
| tsp.422 | Russia | Novyi Urengoy | 422 Urengoy 15-20*           | RU 06 03_0002  | Discontinuous | 76,9066  | 66,3149 | 66,4254   | 10   | false |      |      | 75 Dmitry S. Drozdov              |
| tsp.423 | Russia | Novyi Urengoy | 423 Urengoy 05-06            | RU 28 03_0029  | Discontinuous | 76,9077  | 66,3154 | 66,2469   | 10   | false |      |      | 75 Dmitry S. Drozdov              |
| tsp.424 | Russia | Novyi Urengoy | 424 Urengoy 05-08*           | RU 29 03_0030  | Discontinuous | 76,9089  | 66,3151 | 66,1099   | 9    | false |      |      | 75 Dmitry S. Drozdov              |
| tsp.425 | Russia | Novyi Urengoy | 425 Urengoy 05-09*           | RU 30 03_0031  | Discontinuous | 76,9091  | 66,315  | 66,0855   | 10   | false |      |      | 75 Dmitry S. Drozdov              |
| tsp.426 | Russia | Novyi Urengoy | 426 Urengoy 05-10            | RU 31 03_0032  | Discontinuous | 76,9354  | 66,303  | 58,232    | 3    | false |      |      | 75 Dmitry S. Drozdov              |
| tsp.431 | Russia | Bolvansky     | 431 Bolvansky 54             | RU 18 03_0018  | Continuous    | 54,5042  | 68,2911 | 27,5      | 12   | true  | 2006 | 2016 | 78 Galina Malkova                 |
| tsp.432 | Russia | Bolvansky     | 432 Bolvansky 55             | RU 17 03_0017  | Continuous    | 53,5025  | 68,2897 | 24        | 10   | true  | 2006 | 2016 | 78 Galina Malkova                 |
| tsp.433 | Russia | Bolvansky     | 433 Bolvansky 56             | RU 23 03_0023  | Continuous    | 54,5058  | 68,2897 | 23        | 10   | true  | 2007 | 2016 | 78 Galina Malkova                 |
| tsp.434 | Russia | Bolvansky     | 434 Bolvansky 61             | RU 19 03_0019  | Continuous    | 54,4952  | 68,2874 | 30        | 15   | false |      |      | 78 Galina Malkova                 |
| tsp.435 | Russia | Marre Sale    | 435 Marre Sale 3             | RU 13 03_0009  | Continuous    | 66,8125  | 69,7164 | 0         | 10   | true  | 2006 | 2016 | 103 Alexander A. Vasiliev         |
| tsp.436 | Russia | Marre Sale    | 436 Marre Sale 17            | RU 14 03_0011  | Continuous    | 66,8179  | 69,7152 | 0         | 10   | true  | 2006 | 2016 | 103 Alexander A. Vasiliev         |
| tsp.437 | Russia | Marre Sale    | 437 Marre Sale 1             | RU 12 03_0008  | Continuous    | 66,8139  | 69,7141 | 0         | 10   | true  | 2006 | 2016 | 103 Alexander A. Vasiliev         |
| tsp.438 | Russia | Marre Sale    | 438 Marre Sale 43            | RU 15 03_0013  | Continuous    | 66,8341  | 69,7093 | 0         | 10   | true  | 2006 | 2016 | 103 Alexander A. Vasiliev         |
| tsp.439 | Russia | Bovanenkovo   | 439 Bovanenkovo 2            | RU 04 02_0002  | Continuous    | 70,3483  | 68,5033 | 5         | 0,5  | false |      |      | 74 Anna Kurchatova                |
| tsp.440 | Russia | Bovanenkovo   | 440 Bovanenkovo 1            | RU 03 02_0001  | Continuous    | 70,3983  | 68,4083 | 64,9786   | 0,5  | false |      |      | 74 Anna Kurchatova                |
| tsp.441 | Russia | Novyi Urengoy | 441 Urengoy 05-28*           | RU 32 03_0033  | Continuous    | 76,6923  | 67,4744 | 8,7272    | 9    | false |      |      | 75 Dmitry S. Drozdov              |
| tsp.442 | Russia | Novyi Urengoy | 442 Urengoy 15-04            | RU 33 03_0035  | Continuous    | 76,6913  | 67,4746 | 8,9463    | 10   | false |      |      | 75 Dmitry S. Drozdov              |
| tsp.443 | Russia | Novyi Urengoy | 443 Urengoy 15-06*           | RU 34 03_0036  | Continuous    | 76,6958  | 67,4768 | 14,1661   | 5    | false |      |      | 75 Dmitry S. Drozdov              |
| tsp.444 | Russia | Novyi Urengoy | 444 Urengoy 15-08*           | RU 35 03_0037  | Continuous    | 76,6953  | 67,4779 | 16,6487   | 10   | false |      |      | 75 Dmitry S. Drozdov              |

|         |        |                |                              |               |               |          |         |           |       |       |      |  |      |  |                                   |
|---------|--------|----------------|------------------------------|---------------|---------------|----------|---------|-----------|-------|-------|------|--|------|--|-----------------------------------|
| tsp.445 | Russia | Novyi Urengoy  | 445 Urengoy 15-10            | RU 36 03_0038 | Continuous    | 76,6924  | 67,4781 | 15,9536   | 10    | false |      |  |      |  | 75 Dmitry S. Drozdov              |
| tsp.446 | Russia | Novyi Urengoy  | 446 Urengoy 15-21*           | RU 37 03_0039 | Continuous    | 76,6899  | 67,4779 | 14,7918   | 10    | false |      |  |      |  | 75 Dmitry S. Drozdov              |
| tsp.447 | Russia | Novyi Urengoy  | 447 Urengoy 507              | RU 05 03_0001 | Continuous    | 76,6897  | 67,4781 | 15,0267   | 10    | false |      |  |      |  | 75 Dmitry S. Drozdov              |
| tsp.448 | Russia | Udachny        | 448 Udachny 111              | RU 01 01_0001 | Continuous    | 112,4348 | 66,4338 | 400,6312  | 660   | false |      |  |      |  | 73 Sergey Alexeev                 |
| tsp.449 | Russia | Udachny        | 449 Udachny 1                | RU 96 12_0005 | Continuous    | 112,3258 | 66,3852 | 424,1272  | 15    | true  | 2011 |  | 2013 |  | 82 Sergey Veilikin                |
| tsp.450 | Russia | Udachny        | 450 Udachny 256              | RU 02 01_0002 | Continuous    | 112,3882 | 66,3601 | 441,3631  | 201   | false |      |  |      |  | 73 Sergey Alexeev                 |
| tsp.451 | Russia | Yakutsk        | 451 Tuymada 70               | RU 73 08_0002 | Continuous    | 129,656  | 62,0136 | 118,45    | 70    | true  | 2007 |  | 2013 |  | 137 Pavel Skryabin                |
| tsp.452 | Russia | Yakutsk        | 452 Bestyakh 32              | RU 88 08_0018 | Continuous    | 129,7352 | 61,6851 | 139,754   | 25    | true  | 2007 |  | 2013 |  | 81 Mikail Zheleznyak              |
| tsp.453 | Russia | Yakutsk        | 453 Bestyakh 30              | RU 90 08_0020 | Continuous    | 129,6852 | 61,6851 | 126,4721  | 15    | true  | 2007 |  | 2013 |  | 81 Mikail Zheleznyak              |
| tsp.454 | Russia | Yakutsk        | 454 Bestyakh 31              | RU 89 08_0019 | Continuous    | 129,2519 | 61,3521 | 202,7031  | 15    | true  | 2007 |  | 2013 |  | 81 Mikail Zheleznyak              |
| tsp.464 | Russia | Ust-Kamchatsky | 464 Kamchatka 1_06           | RU 65 06_0012 | Discontinuous | 160,5358 | 55,8878 | 1585,3826 | 9     | true  | 2007 |  | 2011 |  | 31 Andrey Abramov                 |
| tsp.465 | Russia | Ust-Kamchatsky | 465 Kamchatka 11-04          | RU 69 06_0016 | Discontinuous | 160,7482 | 56,1156 | 1425,8685 | 2     | false |      |  |      |  | 31 Andrey Abramov                 |
| tsp.466 | Russia | Ust-Kamchatsky | 466 Kamchatka 3_06           | RU 63 06_0010 | Discontinuous | 160,5058 | 55,9872 | 1980,0931 | 5     | true  | 2006 |  | 2009 |  | 31 Andrey Abramov                 |
| tsp.467 | Russia | Ust-Kamchatsky | 467 Kamchatka 10_04          | RU 64 06_0011 | Discontinuous | 160,5841 | 55,931  | 1424,3774 | 16    | true  | 2007 |  | 2013 |  | 31 Andrey Abramov                 |
| tsp.468 | Russia | Ust-Kamchatsky | 468 Kamchatka 8_03           | RU 62 06_0009 | Discontinuous | 160,2896 | 55,7507 | 1313,9171 | 25    | true  | 2008 |  | 2012 |  | 31 Andrey Abramov                 |
| tsp.503 | Russia | Vankor Field   | 503 Graviyka 1               | RU 82 08_0012 | Continuous    | 86,4274  | 67,4821 | 24        | 10    | false |      |  |      |  | 81 Mikail Zheleznyak              |
| tsp.504 | Russia | Vankor Field   | 504 Bolshaya Heta            | RU 84 08_0014 | Continuous    | 83,5872  | 67,8074 | 41,9024   | 8     | false |      |  |      |  | 81 Mikail Zheleznyak              |
| tsp.505 | Russia | Vankor Field   | 505 Graviyka 2               | RU 83 08_0013 | Continuous    | 86,4379  | 67,4812 | 32        | 10    | false |      |  |      |  | 81 Mikail Zheleznyak              |
| tsp.506 | Russia | Vilyuy Dam     | 506 Cher1                    | RU 92 12_0001 | Continuous    | 112,5014 | 63,0141 | 257       | 15    | true  | 2013 |  | 2014 |  | 82 Sergey Veilikin                |
| tsp.507 | Russia | Vilyuy Dam     | 507 Anyiaah_1                | RU 94 12_0003 | Continuous    | 112,4919 | 63,4413 | 288,1884  | 50    | true  |      |  |      |  | 82 Sergey Veilikin                |
| tsp.508 | Russia | Vilyuy Dam     | 508 Anyiaah_2                | RU 93 12_0002 | Continuous    | 112,4929 | 63,4415 | 288,3117  | 19    | true  | 2008 |  | 2009 |  | 82 Sergey Veilikin                |
| tsp.509 | Russia | Vilyuy Dam     | 509 Svetly_1                 | RU 95 12_0004 | Continuous    | 113,3905 | 62,9654 | 253       | 15    | true  | 2012 |  | 2013 |  | 82 Sergey Veilikin                |
| tsp.634 | Russia | Chukotka       | 634 Lake Elgygytyn           | RU 147 DE01   | Continuous    | 171,9447 | 67,4847 | 507,9668  | 141,5 | true  | 2008 |  | 2011 |  | 84 Georg Schwamborn               |
| tsp.682 | Russia | Neryungri      | 682 NUR-1                    | RU 52 04_0010 | Discontinuous | 124,5828 | 56,743  | 853       | 65    | false |      |  |      |  | 14 Dmitry Sergueev                |
| tsp.683 | Russia | Neryungri      | 683 NUR-2                    | RU 53 04_0011 | Discontinuous | 124,5935 | 56,69   | 796       | 90    | false |      |  |      |  | 14 Dmitry Sergueev                |
| tsp.684 | Russia | Aldan          | 684 Aldan E-5                | RU 80 08_0010 | Continuous    | 126,2251 | 58,6675 | 871       | 10    | false |      |  |      |  | 81 Mikail Zheleznyak              |
| tsp.685 | Russia | Aldan          | 685 Ayansky                  | RU 78 08_0008 | Discontinuous | 125,4493 | 58,1143 | 954       | 15    | false |      |  |      |  | 81 Mikail Zheleznyak              |
| tsp.686 | Russia | Aldan          | 686 Kerak                    | RU 81 08_0011 | Discontinuous | 125,5019 | 57,9832 | 963,4664  | 1     | true  | 2008 |  | 2017 |  | 81 Mikail Zheleznyak              |
| tsp.687 | Russia | Aldan          | 687 Taexhoe 345              | RU 77 08_0007 | Discontinuous | 125,3694 | 57,6957 | 1255,8444 | 30    | true  | 1982 |  | 2017 |  | 81 Mikail Zheleznyak              |
| tsp.690 | Russia | Aldan          | 690 Aldan 312                | RU 74 08_0003 | Discontinuous | 125,3667 | 57,7    | 1211      | 670   | false |      |  |      |  | 81 Mikail Zheleznyak              |
| tsp.692 | Russia | Aldan          | 692 Aldan D-1                | RU 75 08_0005 | Discontinuous | 124,5343 | 57,5336 | 1001      | 1     | true  | 2008 |  | 2015 |  | 81 Mikail Zheleznyak              |
| tsp.694 | Russia | Aldan          | 694 Aldan D-2                | RU 76 08_0006 | Continuous    | 124,5008 | 57,5553 | 1001      | 15    | false |      |  |      |  | 81 Mikail Zheleznyak              |
| tsp.695 | Russia | Aldan          | 695 Aldan 35                 | RU 79 08_0009 | Continuous    | 128,4245 | 58,3587 | 955       | 15    | false |      |  |      |  | 81 Mikail Zheleznyak              |
| tsp.698 | Russia | Magadan        | 698 Olsky pass-6             | RU 85 08_0015 | Discontinuous | 151,0033 | 59,6099 | 345       | 201   | true  |      |  |      |  | 150 Sergey Gulyi                  |
| tsp.700 | Russia | Magadan        | 700 Magadan 28               | RU 87 08_0017 | Discontinuous | 150,9385 | 59,7961 | 303,9013  | 1     | false |      |  |      |  | 81 Mikail Zheleznyak              |
| tsp.701 | Russia | Magadan        | 701 Magadan 27               | RU 86 08_0016 | Discontinuous | 150,9359 | 59,7874 | 424       | 1     | false |      |  |      |  | 81 Mikail Zheleznyak              |
| tsp.896 | Russia | Lensk          | 896 Lensk                    | RU 91 08_0021 | Sporadic      | 114,8684 | 60,717  | 196       | 11    | false |      |  |      |  | 81 Mikail Zheleznyak              |
| tsp.926 | Russia | Cherskii       | 926 Chukochy Cape            | RU 06_0008    | Continuous    | 159,9167 | 70,07   | 38,6128   | 25    | true  | 2007 |  | 2012 |  | 80 Dmitry Fedorov-Davydov         |
| tsp.949 | Russia | Yakutsk        | 949 Tuymada-21               | RU 25         | Continuous    | 129,6568 | 62,0134 | 122,4742  | 21    | false |      |  |      |  | 137 Pavel Skryabin                |
| tsp.950 | Russia | Yakutsk        | 950 Chabada 8-82             | RU 26         | Continuous    | 129,4444 | 61,9278 | 184,765   | 30    | true  | 1982 |  | 2019 |  | 137 Pavel Skryabin                |
| tsp.951 | Russia | Yakutsk        | 951 Tamma 11-87              | RU 27         | Continuous    | 129,7578 | 61,7297 | 156,2375  | 12    | true  | 1987 |  | 2019 |  | 137 Pavel Skryabin                |
| tsp.952 | Russia | Yakutsk        | 952 Tamma 12/87              | RU 28         | Continuous    | 129,8333 | 61,7    | 156,2375  | 12    | true  |      |  |      |  | 137 Pavel Skryabin                |
| tsp.953 | Russia | Yakutsk        | 953 Bes-Kuel 59/87           | RU 29         | Continuous    | 129,3056 | 61,3333 | 209,8197  | 24    | false |      |  |      |  | 137 Pavel Skryabin                |
| tsp.954 | Russia | Yakutsk        | 954 Verkhnyaya Lutenga 11-95 | RU 30         | Continuous    | 128,8333 | 60,9278 | 413,9136  | 11    | true  | 1995 |  | 2019 |  | 137 Pavel Skryabin                |
| tsp.956 | Russia | Vorkuta        | 956 UP33                     | RU 57         | Sporadic      | 64,4833  | 67,4    | 137,7289  | 130   | false |      |  |      |  | 138 Ivan Valentinovich Derevyanko |
| tsp.957 | Russia | Vorkuta        | 957 UP34                     | RU 58         | Sporadic      | 64,5     | 67,4167 | 66,5268   | 90,2  | false |      |  |      |  | 138 Ivan Valentinovich Derevyanko |
| tsp.958 | Russia | Vorkuta        | 958 UK-289                   | RU 59         | Continuous    | 64,2     | 67,55   | 218,8178  | 105,4 | false |      |  |      |  | 138 Ivan Valentinovich Derevyanko |
| tsp.959 | Russia | Vorkuta        | 959 PK-3711                  | RU 60         | Continuous    | 64,8     | 67,9667 | 215,7251  | 691   | false |      |  |      |  | 138 Ivan Valentinovich Derevyanko |
| tsp.960 | Russia | Vorkuta        | 960 3C-65                    | RU 62         | Discontinuous | 63,3333  | 67,3833 | 183,087   | 25,2  | false |      |  |      |  | 138 Ivan Valentinovich Derevyanko |
| tsp.961 | Russia | Vorkuta        | 961 3C-124/124 A             | RU 63         | Discontinuous | 63,3833  | 67,4    | 152,3003  | 31,2  | false |      |  |      |  | 138 Ivan Valentinovich Derevyanko |
| tsp.962 | Russia | Vorkuta        | 962 DC-4/VI-74g              | RU 64         | Discontinuous | 63,3667  | 67,3833 | 171,965   | 25    | false |      |  |      |  | 138 Ivan Valentinovich Derevyanko |
| tsp.963 | Russia | Vorkuta        | 963 P-9                      | RU 67         | Discontinuous | 62,35    | 67,3333 | 90        | 28    | false |      |  |      |  | 138 Ivan Valentinovich Derevyanko |
| tsp.964 | Russia | Vorkuta        | 964 P-10                     | RU 68         | Continuous    | 62,3333  | 67,3333 | 90        | 42,2  | false |      |  |      |  | 138 Ivan Valentinovich Derevyanko |
| tsp.965 | Russia | Vorkuta        | 965 P-53A                    | RU 69         | Continuous    | 62,3667  | 67,3333 | 81,2692   | 17,3  | false |      |  |      |  | 138 Ivan Valentinovich Derevyanko |
| tsp.966 | Russia | Vorkuta        | 966 P-57                     | RU 70         | Continuous    | 62,4     | 67,3167 | 90        | 16,6  | false |      |  |      |  | 138 Ivan Valentinovich Derevyanko |
| tsp.967 | Russia | Vorkuta        | 967 P-60                     | RU 71         | Continuous    | 62,3667  | 67,35   | 89,979    | 19,2  | false |      |  |      |  | 138 Ivan Valentinovich Derevyanko |
| tsp.968 | Russia | Vorkuta        | 968 KT-6                     | RU 73         | Continuous    | 62,4833  | 68,25   | 50,4814   | 25    | false |      |  |      |  | 138 Ivan Valentinovich Derevyanko |
| tsp.969 | Russia | Vorkuta        | 969 KT-12                    | RU 74         | Continuous    | 62,4667  | 68,25   | 61,3515   | 23,5  | false |      |  |      |  | 138 Ivan Valentinovich Derevyanko |
| tsp.970 | Russia | Vorkuta        | 970 Vorkuta K-2              | RU 75         | Continuous    | 64,9333  | 69,2333 | 17,6552   | 16,35 | false |      |  |      |  | 138 Ivan Valentinovich Derevyanko |
| tsp.971 | Russia | Vorkuta        | 971 Vorkuta K-19             | RU 76         | Continuous    | 64,9278  | 69,2458 | 3,4206    | 13,25 | false |      |  |      |  | 138 Ivan Valentinovich Derevyanko |

|          |        |             |                                       |        |        |                  |          |         |           |       |       |     |                               |
|----------|--------|-------------|---------------------------------------|--------|--------|------------------|----------|---------|-----------|-------|-------|-----|-------------------------------|
| tsp.972  | Russia | Vorkuta     | 972                                   | 15     | RU 77  | Continuous       | 63,0833  | 69,0833 | 228       | 250   | false | 138 | Ivan Valentinovich Derevyanko |
| tsp.973  | Russia | Vorkuta     | 973 Vorkuta C-14                      | RU 79  |        | Continuous       | 64,6167  | 68,45   | 157,5378  | 188   | false | 138 | Ivan Valentinovich Derevyanko |
| tsp.974  | Russia | Vorkuta     | 974 C-17                              | RU 80  |        | Continuous       | 64,6667  | 68,4667 | 163,4457  | 151   | false | 138 | Ivan Valentinovich Derevyanko |
| tsp.975  | Russia | Vorkuta     | 975 C-143                             | RU 81  |        | Continuous       | 66,5833  | 68,0167 | 309,0882  | 463   | false | 138 | Ivan Valentinovich Derevyanko |
| tsp.976  | Russia | Vorkuta     | 976 C-164                             | RU 82  |        | Continuous       | 66,5667  | 68,0333 | 458,4956  | 297,8 | false | 138 | Ivan Valentinovich Derevyanko |
| tsp.977  | Russia | Vorkuta     | 977 C-267                             | RU 83  |        | Continuous       | 66,6     | 68,0167 | 302,5714  | 690   | false | 138 | Ivan Valentinovich Derevyanko |
| tsp.978  | Russia | Vorkuta     | 978 3 (Polar Ural)                    | RU 84  |        | Continuous       | 66,75    | 67,8333 | 66,5268   | 10,6  | false | 138 | Ivan Valentinovich Derevyanko |
| tsp.979  | Russia | Vorkuta     | 979 8 (Polar Ural)                    | RU 85  |        | Continuous       | 66,75    | 67,8333 | 210,6776  | 14,5  | false | 138 | Ivan Valentinovich Derevyanko |
| tsp.980  | Russia | Vorkuta     | 980 12 (Polar Ural)                   | RU 86  |        | Continuous       | 66,65    | 67,8333 | 122,7257  | 13,5  | false | 138 | Ivan Valentinovich Derevyanko |
| tsp.981  | Russia | Vorkuta     | 981 13 (Polar Ural)                   | RU 87  |        | Continuous       | 66,8     | 67,8333 | 69,447    | 80,6  | false | 138 | Ivan Valentinovich Derevyanko |
| tsp.982  | Russia | Vorkuta     | 982 EK-102                            | RU 88  |        | Continuous       | 65,5667  | 67,3167 | 250,0166  | 28    | false | 138 | Ivan Valentinovich Derevyanko |
| tsp.983  | Russia | Vorkuta     | 983 Vorkuta 116                       | RU 89  |        | Continuous       | 65,5667  | 67,3167 | 250,0166  | 38    | false | 138 | Ivan Valentinovich Derevyanko |
| tsp.984  | Russia | Vorkuta     | 984                                   | 41     | RU 90  | Continuous       | 64,3833  | 66,8167 | 297,3835  | 300   | false | 138 | Ivan Valentinovich Derevyanko |
| tsp.985  | Russia | Vorkuta     | 985                                   | 95     | RU 95  | Continuous       | 62,8667  | 66,0833 | 439,9714  | 15    | false | 138 | Ivan Valentinovich Derevyanko |
| tsp.986  | Russia | Vorkuta     | 986                                   | 100    | RU 92  | Continuous       | 62,8667  | 66,0833 | 439,9714  | 7     | false | 138 | Ivan Valentinovich Derevyanko |
| tsp.987  | Russia | Vorkuta     | 987 6 (Pre-Polar Ural)                | RU 93  |        | Continuous       | 61,0667  | 65,4333 | 440,1963  | 14,1  | false | 138 | Ivan Valentinovich Derevyanko |
| tsp.988  | Russia | Vorkuta     | 988 PV-72                             | RU 94  |        | Continuous       | 61,1167  | 65,55   | 372,55    | 516   | false | 138 | Ivan Valentinovich Derevyanko |
| tsp.989  | Russia | Vorkuta     | 989 PV-94                             | RU 95  |        | Continuous       | 61,1167  | 65,5667 | 356,6439  | 327   | false | 138 | Ivan Valentinovich Derevyanko |
| tsp.990  | Russia | Vorkuta     | 990 KCK-11                            | RU 96  |        | Continuous       | 59,7333  | 65,25   | 525,9736  | 421   | false | 138 | Ivan Valentinovich Derevyanko |
| tsp.991  | Russia | Vorkuta     | 991 3G                                | RU 07  |        | Continuous       | 60,25    | 65,2    | 780,5795  | 572   | false | 138 | Ivan Valentinovich Derevyanko |
| tsp.992  | Russia | Vorkuta     | 992                                   | 202    | RU 98  | Continuous       | 60,2167  | 65,2167 | 984,4496  | 141   | false | 138 | Ivan Valentinovich Derevyanko |
| tsp.993  | Russia | Vorkuta     | 993                                   | 210    | RU 99  | Continuous       | 60,2167  | 65,2333 | 1159,3228 | 102   | false | 138 | Ivan Valentinovich Derevyanko |
| tsp.994  | Russia | Vorkuta     | 994                                   | 13     | RU 100 | Sporadic         | 61,9     | 66,3    | 66,5268   | 12,7  | false | 138 | Ivan Valentinovich Derevyanko |
| tsp.995  | Russia | Vorkuta     | 995 15 (European Pre-Ural)            | RU 101 |        | Sporadic         | 61,9333  | 66,3    | 84        | 15,8  | false | 138 | Ivan Valentinovich Derevyanko |
| tsp.996  | Russia | Vorkuta     | 996                                   | 72     | RU 102 | Continuous       | 62,4     | 66,2    | 175,7378  | 13    | false | 138 | Ivan Valentinovich Derevyanko |
| tsp.997  | Russia | Vorkuta     | 997                                   | 33     | RU 103 | Continuous       | 61,5     | 67,9667 | 138,8101  | 17    | false | 138 | Ivan Valentinovich Derevyanko |
| tsp.998  | Russia | Vorkuta     | 998                                   | 45     | RU 104 | Continuous       | 61,5667  | 67,9667 | 66,5268   | 16    | false | 138 | Ivan Valentinovich Derevyanko |
| tsp.999  | Russia | Vorkuta     | 999                                   | 51     | RU 105 | Continuous       | 61,6667  | 67,9333 | 161,1651  | 14    | false | 138 | Ivan Valentinovich Derevyanko |
| tsp.1000 | Russia | Vorkuta     | 1000                                  | 62     | RU 106 | Continuous       | 61,4333  | 67,95   | 141,36    | 16,5  | false | 138 | Ivan Valentinovich Derevyanko |
| tsp.1001 | Russia | Vorkuta     | 1001 100 (Nenetskiy avtonomniy okrug) | RU 107 |        | Continuous       | 61,5167  | 67,95   | 66,5268   | 15,9  | false | 138 | Ivan Valentinovich Derevyanko |
| tsp.1002 | Russia | Vorkuta     | 1002 BGK-1                            | RU 108 |        | Continuous       | 60,5667  | 67,4    | 66,5268   | 510   | false | 138 | Ivan Valentinovich Derevyanko |
| tsp.1003 | Russia | Vorkuta     | 1003 BGK-7                            | RU 109 |        | Continuous       | 60,4333  | 67,7333 | 119       | 600   | false | 138 | Ivan Valentinovich Derevyanko |
| tsp.1004 | Russia | Vorkuta     | 1004                                  | 1023   | RU 110 | Isolated Patches | 57,1833  | 66,45   | 60,8718   | 520   | false | 138 | Ivan Valentinovich Derevyanko |
| tsp.1005 | Russia | Vorkuta     | 1005                                  | 102    | RU 111 | Isolated Patches | 57,9833  | 66,0944 | 80,6503   | 480   | false | 138 | Ivan Valentinovich Derevyanko |
| tsp.1007 | Russia | Deputatskiy | 1007 0 (Deputatskiy)                  | RU 118 |        | Continuous       | 139,3167 | 69      | 462,3707  | 88    | false | 103 | Alexander A. Vasiliev         |
| tsp.1008 | Russia | Deputatskiy | 1008 08 (Deputatskiy)                 | RU 119 |        | Continuous       | 139,3333 | 69      | 473,338   | 96    | false | 103 | Alexander A. Vasiliev         |
| tsp.1009 | Russia | Deputatskiy | 1009 8 (Deputatskiy)                  | RU 120 |        | Continuous       | 139,3333 | 69,0167 | 504,0799  | 80    | false | 103 | Alexander A. Vasiliev         |
| tsp.1010 | Russia | Deputatskiy | 1010 16 (Deputatskiy)                 | RU 121 |        | Continuous       | 139,3167 | 69      | 462,3707  | 82    | false | 103 | Alexander A. Vasiliev         |
| tsp.1011 | Russia | Deputatskiy | 1011 24 (Deputatskiy)                 | RU 122 |        | Continuous       | 139,25   | 69,0167 | 523,3068  | 198   | false | 103 | Alexander A. Vasiliev         |
| tsp.1012 | Russia | Deputatskiy | 1012 26 (Deputatskiy)                 | RU 123 |        | Continuous       | 139,3    | 69,0167 | 528,2929  | 60    | false | 103 | Alexander A. Vasiliev         |
| tsp.1013 | Russia | Deputatskiy | 1013 40 (Deputatskiy)                 | RU 124 |        | Continuous       | 139,3333 | 68,9833 | 490,7271  | 200   | false | 103 | Alexander A. Vasiliev         |
| tsp.1014 | Russia | Deputatskiy | 1014 120 (Deputatskiy)                | RU 125 |        | Continuous       | 139,3    | 68,9833 | 452,2953  | 200   | false | 103 | Alexander A. Vasiliev         |
| tsp.1015 | Russia | Deputatskiy | 1015 200 (Deputatskiy)                | RU 126 |        | Continuous       | 139,2833 | 68,9833 | 435,9851  | 200   | false | 103 | Alexander A. Vasiliev         |
| tsp.1016 | Russia | Yana Bay    | 1016 90 (Yana Bay)                    | RU 127 |        | Continuous       | 134,1631 | 70,6333 | 74,3964   | 60    | false | 103 | Alexander A. Vasiliev         |
| tsp.1017 | Russia | Yana Bay    | 1017 97 (Yana Bay)                    | RU 128 |        | Continuous       | 134,0167 | 70,65   | 102,5579  | 201,5 | false | 103 | Alexander A. Vasiliev         |
| tsp.1018 | Russia | Yana Bay    | 1018 146 (Yana Bay)                   | RU 129 |        | Continuous       | 134,35   | 70,6167 | 177,9359  | 142,2 | false | 103 | Alexander A. Vasiliev         |
| tsp.1019 | Russia | Yana Bay    | 1019 148 (Yana Bay)                   | RU 130 |        | Continuous       | 134,35   | 70,6    | 205,9334  | 200   | false | 103 | Alexander A. Vasiliev         |
| tsp.1020 | Russia | Yana Bay    | 1020 150 (Yana Bay)                   | RU 131 |        | Continuous       | 134,3333 | 70,6    | 183,5414  | 142,2 | false | 103 | Alexander A. Vasiliev         |
| tsp.1021 | Russia | Yana Bay    | 1021 152 (Yana Bay)                   | RU 132 |        | Continuous       | 134,3667 | 70,6167 | 150,3234  | 76,2  | false | 103 | Alexander A. Vasiliev         |
| tsp.1022 | Russia | Yana Bay    | 1022 201 (Yana Bay)                   | RU 133 |        | Continuous       | 134,5    | 70,65   | 246,0427  | 220   | false | 103 | Alexander A. Vasiliev         |
| tsp.1023 | Russia | Yana Bay    | 1023 207 (Yana Bay)                   | RU 134 |        | Continuous       | 134,5167 | 70,6333 | 207,7351  | 104,5 | false | 103 | Alexander A. Vasiliev         |
| tsp.1024 | Russia | Yana Bay    | 1024 230 (Yana Bay)                   | RU 135 |        | Continuous       | 134,2667 | 70,6    | 161,5123  | 116,4 | false | 103 | Alexander A. Vasiliev         |
| tsp.1025 | Russia | Yana Bay    | 1025 231 (Yana Bay)                   | RU 136 |        | Continuous       | 134,2833 | 70,6167 | 161,3074  | 76,2  | false | 103 | Alexander A. Vasiliev         |
| tsp.1026 | Russia | Yana Bay    | 1026 302 (Yana Bay)                   | RU 137 |        | Continuous       | 134,25   | 70,6    | 183,64    | 201   | false | 103 | Alexander A. Vasiliev         |
| tsp.1027 | Russia | Yana Bay    | 1027 304 (Yana Bay)                   | RU 138 |        | Continuous       | 134,3333 | 70,6167 | 199,2947  | 171,1 | false | 103 | Alexander A. Vasiliev         |
| tsp.1028 | Russia | Yana Bay    | 1028 306 (Yana Bay)                   | RU 139 |        | Continuous       | 134,3333 | 70,6167 | 199,2947  | 133   | false | 103 | Alexander A. Vasiliev         |
| tsp.1029 | Russia | Yana Bay    | 1029 307 (Yana Bay)                   | RU 140 |        | Continuous       | 134,5333 | 70,6333 | 233,1626  | 211   | false | 103 | Alexander A. Vasiliev         |
| tsp.1030 | Russia | Yana Bay    | 1030 336 (Yana Bay)                   | RU 141 |        | Continuous       | 134,3667 | 70,6333 | 138,4532  | 83,9  | false | 103 | Alexander A. Vasiliev         |
| tsp.1031 | Russia | Yana Bay    | 1031 337 (Yana Bay)                   | RU 142 |        | Continuous       | 134,3333 | 70,6333 | 122,1769  | 198   | false | 103 | Alexander A. Vasiliev         |
| tsp.1032 | Russia | Yana Bay    | 1032 375 (Yana Bay)                   | RU 143 |        | Continuous       | 134,55   | 70,65   | 250,3456  | 147   | false | 103 | Alexander A. Vasiliev         |

|          |        |                |                           |                |               |          |           |           |       |       |      |      |  |                           |
|----------|--------|----------------|---------------------------|----------------|---------------|----------|-----------|-----------|-------|-------|------|------|--|---------------------------|
| tsp.1033 | Russia | Dghanky        | 1033 19 (Dghanky)         | RU 144         | Continuous    | 135,0833 | 69,5333   | 130,0972  | 95    | false |      |      |  | 103 Alexander A. Vasiliev |
| tsp.1034 | Russia | Dghanky        | 1034 39 (Dghanky)         | RU 145         | Continuous    | 135,1167 | 69,55     | 241,8816  | 95    | false |      |      |  | 103 Alexander A. Vasiliev |
| tsp.1035 | Russia | Dghanky        | 1035 142 (Dghanky)        | RU 146         | Continuous    | 135,0333 | 69,5333   | 215,0056  | 95    | false |      |      |  | 103 Alexander A. Vasiliev |
| tsp.1036 | Russia | Dghanky        | 1036 270 (Dghanky)        | RU 147         | Continuous    | 135,1    | 69,55     | 191,9326  | 76    | false |      |      |  | 103 Alexander A. Vasiliev |
| tsp.1037 | Russia | Dghanky        | 1037 287 (Dghanky)        | RU 148         | Continuous    | 135,1    | 69,5333   | 134,5526  | 95    | false |      |      |  | 103 Alexander A. Vasiliev |
| tsp.1038 | Russia | Dghanky        | 1038 316 (Dghanky)        | RU 149         | Continuous    | 135,0667 | 69,5333   | 155,1049  | 95    | false |      |      |  | 103 Alexander A. Vasiliev |
| tsp.1039 | Russia | Dghanky        | 1039 346 (Dghanky)        | RU 150         | Continuous    | 135,05   | 69,5333   | 194,7635  | 95    | false |      |      |  | 103 Alexander A. Vasiliev |
| tsp.1040 | Russia | Dghanky        | 1040 403 (Dghanky)        | RU 151         | Continuous    | 135,0667 | 69,5333   | 155,1049  | 95    | false |      |      |  | 103 Alexander A. Vasiliev |
| tsp.1041 | Russia | Dghanky        | 1041 411 (Dghanky)        | RU 152         | Continuous    | 135,1    | 69,55     | 191,9326  | 95    | false |      |      |  | 103 Alexander A. Vasiliev |
| tsp.1042 | Russia | Russkoye Ustye | 1042 23 (Russkoye Ustye)  | RU 153         | Continuous    | 141,8167 | 71,1167   | 57,2771   | 207   | false |      |      |  | 103 Alexander A. Vasiliev |
| tsp.1043 | Russia | Russkoye Ustye | 1043 28a (Russkoye Ustye) | RU 154         | Continuous    | 141,7667 | 71,1167   | 127,5765  | 500   | false |      |      |  | 103 Alexander A. Vasiliev |
| tsp.1044 | Russia | Russkoye Ustye | 1044 32 (Russkoye Ustye)  | RU 155         | Continuous    | 141,7667 | 71,1167   | 127,5765  | 260   | false |      |      |  | 103 Alexander A. Vasiliev |
| tsp.1045 | Russia | Russkoye Ustye | 1045 36 (Russkoye Ustye)  | RU 156         | Continuous    | 141,7667 | 71,1167   | 127,5765  | 83,3  | false |      |      |  | 103 Alexander A. Vasiliev |
| tsp.1046 | Russia | Russkoye Ustye | 1046 37 (Russkoye Ustye)  | RU 157         | Continuous    | 141,7833 | 71,1167   | 89,6112   | 156,4 | false |      |      |  | 103 Alexander A. Vasiliev |
| tsp.1047 | Russia | Russkoye Ustye | 1047 45 (Russkoye Ustye)  | RU 158         | Continuous    | 141,7833 | 71,1167   | 89,6112   | 116,4 | false |      |      |  | 103 Alexander A. Vasiliev |
| tsp.1048 | Russia | Russkoye Ustye | 1048 60 (Russkoye Ustye)  | RU 159         | Continuous    | 141,7667 | 71,1167   | 127,5765  | 226   | false |      |      |  | 103 Alexander A. Vasiliev |
| tsp.1049 | Russia | Russkoye Ustye | 1049 66 (Russkoye Ustye)  | RU 161         | Continuous    | 141,7667 | 71,1167   | 127,5765  | 276   | false |      |      |  | 103 Alexander A. Vasiliev |
| tsp.1050 | Russia | Russkoye Ustye | 1050 69 (Russkoye Ustye)  | RU 162         | Continuous    | 141,7667 | 71,1167   | 127,5765  | 123,2 | false |      |      |  | 103 Alexander A. Vasiliev |
| tsp.1051 | Russia | Marre Sale     | 1051 Marre-Sale, N1       | RU 168         | Continuous    | 66,5     | 69,7      | -18,0257  | 10    | false |      |      |  | 139 Alexander V. Pavlov   |
| tsp.1052 | Russia | Marre Sale     | 1052 Marre-Sale, N2       | RU 169         | Continuous    | 66,5     | 69,7      | -18,0257  | 10    | false |      |      |  | 139 Alexander V. Pavlov   |
| tsp.1054 | Russia | Marre Sale     | 1054 Marre-Sale, N5       | RU 171         | Continuous    | 66,5     | 69,7      | -18,0257  | 10    | false |      |      |  | 139 Alexander V. Pavlov   |
| tsp.1055 | Russia | Marre Sale     | 1055 Marre-Sale, N9       | RU 172         | Continuous    | 66,5     | 69,7      | -18,0257  | 10    | false |      |      |  | 139 Alexander V. Pavlov   |
| tsp.1056 | Russia | Marre Sale     | 1056 Marre-Sale, N17      | RU 173         | Continuous    | 66,5     | 69,7      | -18,0257  | 10    | false |      |      |  | 139 Alexander V. Pavlov   |
| tsp.1057 | Russia | Marre Sale     | 1057 Marre-Sale, N32      | RU 174         | Continuous    | 66,5     | 69,7      | -18,0257  | 10    | false |      |      |  | 139 Alexander V. Pavlov   |
| tsp.1058 | Russia | Marre Sale     | 1058 Marre-Sale, N36      | RU 175         | Continuous    | 66,5     | 69,7      | -18,0257  | 10    | false |      |      |  | 139 Alexander V. Pavlov   |
| tsp.1059 | Russia | Marre Sale     | 1059 Marre-Sale, N44      | RU 176         | Continuous    | 66,5     | 69,7      | -18,0257  | 10    | false |      |      |  | 139 Alexander V. Pavlov   |
| tsp.1060 | Russia | Tiksi          | 1060 1_01                 | RU 189         | Continuous    | 129,42   | 71,7869   | 9,2578    | 35    | false |      |      |  | 79 Alexander L. Kholodov  |
| tsp.1061 | Russia | Tiksi          | 1061 2_01                 | RU 152 06_0019 | Continuous    | 129,4014 | 71,7843   | 24,0658   | 5     | false |      |      |  | 79 Alexander L. Kholodov  |
| tsp.1062 | Russia | Tiksi          | 1062 3_03                 | RU 192         | Continuous    | 129,6667 | 72,3      | -0,3795   | 20    | false |      |      |  | 79 Alexander L. Kholodov  |
| tsp.1063 | Russia | Tiksi          | 1063 10_3                 | RU 193         | Continuous    | 129,5833 | 72,2333   | 0,0079    | 25    | false |      |      |  | 79 Alexander L. Kholodov  |
| tsp.1064 | Russia | Tiksi          | 1064 12_03                | RU 194         | Continuous    | 129,6    | 72,2333   | 0,6317    | 12    | false |      |      |  | 79 Alexander L. Kholodov  |
| tsp.1065 | Russia | Tiksi          | 1065 IV4-3                | RU 195         | Continuous    | 129,6167 | 72,2333   | 0,1255    | 14    | false |      |      |  | 79 Alexander L. Kholodov  |
| tsp.1068 | Russia | Nadym          | 1068 Nadym 13_72          | RU 276         | Discontinuous | 72,85    | 65,3      | 7         | 10    | false |      |      |  | 76 Natalia Moskalenko     |
| tsp.1073 | Russia | Nadym          | 1073 Nadym 18_72          | RU 281         | Discontinuous | 72,85    | 65,3      | 7         | 10    | false |      |      |  | 76 Natalia Moskalenko     |
| tsp.1074 | Russia | Nadym          | 1074 Nadym 19_72          | RU 282         | Discontinuous | 72,85    | 65,3      | 7         | 10    | false |      |      |  | 76 Natalia Moskalenko     |
| tsp.1075 | Russia | Magadan        | 1075 Magadan 1            | RU 163         | Discontinuous | 150,0667 | 59,7      | 8,4267    | 233   | false |      |      |  | 140 Georgy Z. Perlshtein  |
| tsp.1076 | Russia | Magadan        | 1076 Magadan 2            | RU 164         | Discontinuous | 150,2667 | 59,6667   | 8,3003    | 200   | false |      |      |  | 140 Georgy Z. Perlshtein  |
| tsp.1077 | Russia | Magadan        | 1077 Magadan 4            | RU 166         | Discontinuous | 150      | 59,6167   | -20,4997  | 201   | false |      |      |  | 140 Georgy Z. Perlshtein  |
| tsp.1078 | Russia | Magadan        | 1078 Olsky pass-9         | RU 167         | Discontinuous | 151,0214 | 59,6317   | 415,3579  | 233   | true  | 1990 | 2022 |  | 150 Sergey Gulyi          |
| tsp.1079 | Russia | Magadan        | 1079 Magadan 3            | RU 165         | Discontinuous | 148,8167 | 62,7      | 1022,3729 | 376   | false |      |      |  | 140 Georgy Z. Perlshtein  |
| tsp.1100 | Russia | Nadym          | 1100 Nadym 3_09           | Discontinuous  | 72,8692       | 65,3158  | 7         | 10        | true  | 2010  | 2013 |      |  | 76 Natalia Moskalenko     |
| tsp.1101 | Russia | Nadym          | 1101 Nadym 4_09           | Discontinuous  | 72,8817       | 65,3225  | 7         | 10        | true  | 2010  | 2011 |      |  | 76 Natalia Moskalenko     |
| tsp.1102 | Russia | Nadym          | 1102 Nadym 8_10           | Discontinuous  | 72,8742       | 65,6748  | 15        | 10        | true  | 2006  | 2007 |      |  | 76 Natalia Moskalenko     |
| tsp.1103 | Russia | Nadym          | 1103 Nadym 3pr_91         | Discontinuous  | 72,8599       | 65,3155  | 7         | 10        | true  | 2011  | 2013 |      |  | 76 Natalia Moskalenko     |
| tsp.1104 | Russia | Nadym          | 1104 Nadym 10-12          | Discontinuous  | 72,8834       | 65,2993  | 7         | 10        | true  | 2012  | 2013 |      |  | 76 Natalia Moskalenko     |
| tsp.1105 | Russia | Nadym          | 1105 Nadym 11_12          | Discontinuous  | 72,8491       | 65,3079  | 7         | 10        | true  | 2012  | 2013 |      |  | 76 Natalia Moskalenko     |
| tsp.1106 | Russia | Nadym          | 1106 Nadym 9_11           | Discontinuous  | 72,8848       | 65,2986  | 7         | 10        | true  | 2012  | 2013 |      |  | 76 Natalia Moskalenko     |
| tsp.1111 | Russia | Yakutsk        | 1111 Spasskaya 1          | Continuous     | 129,6175      | 62,2549  | 213,8388  | 7         | true  | 1996  | 2022 |      |  | 118 Pavel Konstantinov    |
| tsp.1112 | Russia | Yakutsk        | 1112 Spasskaya 11         | Continuous     | 129,6203      | 62,2523  | 215,5483  | 7         | true  | 1997  | 2022 |      |  | 118 Pavel Konstantinov    |
| tsp.1113 | Russia | Tiksi          | 1113 Tiksi_stone_ridge    | Continuous     | 128,7773      | 71,5867  | 46,571    | 30        | true  | 1992  | 2022 |      |  | 81 Mikhail Zheleznyak     |
| tsp.1114 | Russia | Aldan          | 1114 Evota                | Discontinuous  | 125,1806      | 57,5433  | 1346,8451 | 5         | true  | 2010  | 2017 |      |  | 81 Mikhail Zheleznyak     |
| tsp.1115 | Russia | Yakutsk        | 1115 Chabada 5-81         | Continuous     | 129,4176      | 61,9637  | 221,9717  | 21        | true  | 1981  | 2019 |      |  | 137 Pavel Skryabin        |
| tsp.1116 | Russia | Chara          | 1116 Belenkiy-2           | Continuous     | 118,1916      | 56,7608  | 728,1597  | 0,3       | true  |       |      |      |  | 14 Dmitry Sergueev        |
| tsp.1117 | Russia | Chara          | 1117 Vega-23              | Continuous     | 118,0819      | 56,9017  | 800,662   | 30        | true  | 2013  | 2022 |      |  | 14 Dmitry Sergueev        |
| tsp.1118 | Russia | Olkhon         | 1118 Olkhon-Pit           | RU-200         | Sporadic      | 107,4397 | 53,2303   | 474,7017  | 3,65  | true  |      |      |  | 156 Elena Kozireva        |
| tsp.1135 | Russia | Olkhon         | 1135 Olkhon-2             | Sporadic       | 107,436       | 53,229   | 477,4343  | 9         | true  | 2013  | 2019 |      |  | 156 Elena Kozireva        |
| tsp.1136 | Russia | Olkhon         | 1136 Olkhon-3             | Sporadic       | 107,4353      | 53,229   | 476,4578  | 15        | true  | 2013  | 2019 |      |  | 156 Elena Kozireva        |
| tsp.1137 | Russia | Olkhon         | 1137 Olkhon-4             | Sporadic       | 107,4473      | 53,2195  | 544,0372  | 3,5       | true  | 2013  | 2017 |      |  | 156 Elena Kozireva        |
| tsp.1141 | Russia | Kytalyk        | 1141 Kytalik_GI-01_7m     | Continuous     | 147,4883      | 70,8304  | 5         | 7         | true  | 2010  | 2014 |      |  | 60 Go Iwahana             |
| tsp.1154 | Russia | Nadym          | 1154 ND_skv8_10           | RU 155 03_0048 | Discontinuous | 72,8742  | 65,3156   | 6         | 10    | false |      |      |  | 76 Natalia Moskalenko     |

|          |        |               |                            |                    |                  |          |         |          |     |       |      |      |  |  |                          |
|----------|--------|---------------|----------------------------|--------------------|------------------|----------|---------|----------|-----|-------|------|------|--|--|--------------------------|
| tsp.1156 | Russia | Vaskiny Dachy | 1156 VD CALM               | RU 159 03_0052     | Continuous       | 68,9072  | 70,2836 | 54,6067  | 1,5 | false |      |      |  |  | 79 Alexander L. Kholodov |
| tsp.1157 | Russia | Vaskiny Dachy | 1157 VD_AG19/23            | RU 160 03_0053     | Continuous       | 68,9091  | 70,2826 | 54       | 1,5 | false |      |      |  |  | 79 Alexander L. Kholodov |
| tsp.1158 | Russia | Nadym         | 1158 ND_skv3_09            | RU 153 03_0046     | Discontinuous    | 72,8692  | 65,3158 | 7        | 10  | false |      |      |  |  | 76 Natalia Moskalenko    |
| tsp.1159 | Russia | Vaskiny Dachy | 1159 VD1                   | RU 156 03_0049     | Continuous       | 68,8916  | 70,2755 | 52       | 0,9 | false |      |      |  |  | 79 Alexander L. Kholodov |
| tsp.1160 | Russia | Chara         | 1160 Chara 5301            | RU 46 04_0003      | Continuous       | 118,3663 | 56,6761 | 1155     | 2   | false |      |      |  |  | 14 Dmitry Sergueev       |
| tsp.1164 | Russia | Nadym         | 1164 ND_skv4_09            | RU 154 03_0047     | Discontinuous    | 72,8817  | 65,3225 | 6        | 10  | false |      |      |  |  | 76 Natalia Moskalenko    |
| tsp.1165 | Russia | Vaskiny Dachy | 1165 VD2                   | RU 157 03_0050     | Continuous       | 68,8835  | 70,2955 | 46       | 1   | false |      |      |  |  | 79 Alexander L. Kholodov |
| tsp.1166 | Russia | Vaskiny Dachy | 1166 VD3                   | RU 158 03_0051     | Continuous       | 68,8413  | 70,3014 | 47       | 1   | false |      |      |  |  | 79 Alexander L. Kholodov |
| tsp.1167 | Russia | Vaskiny Dachy | 1167 LGT                   | RU 161 03_0054     | Continuous       | 68,8916  | 70,2811 | 53       | 7   | false |      |      |  |  | 79 Alexander L. Kholodov |
| tsp.1169 | Russia | Vorkuta       | 1169                       | 105 RU 161 03_0055 | Continuous       | 61,5206  | 67,9598 | 140      | 6,5 | false |      |      |  |  | 83 Naum G. Oberman       |
| tsp.1181 | Russia | Khanovey      | 1181 Khanovey-1            |                    | Continuous       | 63,6531  | 67,2929 | 103,2298 | 4,8 | true  |      |      |  |  | 167 Vladislav Isaev      |
| tsp.1182 | Russia | Khanovey      | 1182 Khanovey-2            |                    | Continuous       | 63,6524  | 67,293  | 103,2298 | 5,8 | true  |      |      |  |  | 167 Vladislav Isaev      |
| tsp.1183 | Russia | Khanovey      | 1183 Khanovey-3            |                    | Continuous       | 63,6562  | 67,2923 | 98,3663  | 5,3 | true  | 2015 | 2020 |  |  | 167 Vladislav Isaev      |
| tsp.1184 | Russia | Khanovey      | 1184 Khanovey-4            |                    | Continuous       | 63,6479  | 67,2949 | 113,3141 | 0,5 | true  | 2015 | 2021 |  |  | 167 Vladislav Isaev      |
| tsp.1605 | Russia | Tyumen        | 1605 Ishim                 |                    | No permafrost    | 69,5167  | 56,1333 | 82,25    | 3,2 | true  | 1931 | 1990 |  |  | 164 NSIDC User Services  |
| tsp.1606 | Russia | Yamal-Nenets  | 1606 Tarko-Sale            |                    | Discontinuous    | 77,8167  | 64,9167 | 23,72    | 3,2 | true  | 1962 | 1990 |  |  | 164 NSIDC User Services  |
| tsp.1607 | Russia | Khanty-Mansi  | 1607 Khanty-Mansiisk       |                    |                  | 69,0667  | 60,9667 | 29,267   | 3,2 | true  | 1961 | 1990 |  |  | 164 NSIDC User Services  |
| tsp.1608 | Russia | Khanty-Mansi  | 1608 Ugut                  |                    | Isolated patches | 74,0167  | 60,5    | 69,612   | 3,2 | true  | 1959 | 1961 |  |  | 164 NSIDC User Services  |
| tsp.1609 | Russia | Tyumen        | 1609 Tobolsk               |                    |                  | 68,1833  | 58,15   | 40       | 3,2 | true  | 1931 | 1957 |  |  | 164 NSIDC User Services  |
| tsp.1610 | Russia | Omsk          | 1610 Russkaya Polyana      |                    | No permafrost    | 73,8333  | 53,8333 | 114,83   | 3,2 | true  | 1955 | 1990 |  |  | 164 NSIDC User Services  |
| tsp.1611 | Russia | Nenets        | 1611 Kotkino               |                    | Sporadic         | 51,2     | 67,0167 | 30,051   | 3,2 | true  | 1960 | 1990 |  |  | 164 NSIDC User Services  |
| tsp.1612 | Russia | Amur          | 1612 Skovorodino           |                    | Sporadic         | 123,9667 | 54      | 394,41   | 3,2 | true  | 1952 | 1987 |  |  | 164 NSIDC User Services  |
| tsp.1613 | Russia | Arkhangel'sk  | 1613 Arkhangelsk Solombala |                    | No permafrost    | 40,5     | 64,5833 | 1        | 3,2 | true  | 1931 | 1964 |  |  | 164 NSIDC User Services  |
| tsp.1614 | Russia | Vorkuta       | 1614 Ust-Usa               |                    | No permafrost    | 56,9167  | 65,9667 | 54,486   | 3,2 | true  | 1954 | 1990 |  |  | 164 NSIDC User Services  |
| tsp.1615 | Russia | Bashkortostan | 1615 Chishmy               |                    |                  | 55,3833  | 54,5667 | 95,094   | 3,2 | true  | 1930 | 1990 |  |  | 164 NSIDC User Services  |
| tsp.1616 | Russia | Bashkortostan | 1616 Sterlitamak           |                    | No permafrost    | 55,9833  | 53,6167 | 126,81   | 3,2 | true  | 1933 | 1990 |  |  | 164 NSIDC User Services  |
| tsp.1617 | Russia | Krasnoyarsk   | 1617 Bogotol               |                    | No permafrost    | 89,5833  | 56,2333 | 280,71   | 3,2 | true  | 1929 | 1990 |  |  | 164 NSIDC User Services  |
| tsp.1618 | Russia | Krasnoyarsk   | 1618 Kacha                 |                    |                  | 92,2     | 56,1167 | 474,56   | 3,2 | true  | 1930 | 1990 |  |  | 164 NSIDC User Services  |
| tsp.1619 | Russia | Tomsk         | 1619 Parabel               |                    |                  | 81,5     | 58,7    | 54,7     | 3,2 | true  | 1928 | 1990 |  |  | 164 NSIDC User Services  |
| tsp.1620 | Russia | Novosibirsk   | 1620 Kupino                |                    | No permafrost    | 77,2833  | 54,3667 | 117      | 3,2 | true  | 1944 | 1990 |  |  | 164 NSIDC User Services  |
| tsp.1621 | Russia | Altay         | 1621 Biisk zonalnaya       |                    | No permafrost    | 84,95    | 52,6833 | 229,71   | 3,2 | true  | 1929 | 1990 |  |  | 164 NSIDC User Services  |
| tsp.1622 | Russia | Altay         | 1622 Kamen-na-Obi          |                    | No permafrost    | 81,3333  | 53,8    | 118,79   | 3,2 | true  | 1928 | 1990 |  |  | 164 NSIDC User Services  |
| tsp.1623 | Russia | Amur          | 1623 Svobodnyi             |                    | No permafrost    | 128,116  | 51,45   | 192,42   | 3,2 | true  | 1939 | 1990 |  |  | 164 NSIDC User Services  |
| tsp.1624 | Russia | Amur          | 1624 Shimanovskaya         |                    | No permafrost    | 127,65   | 51,9833 | 277,38   | 3,2 | true  | 1935 | 1990 |  |  | 164 NSIDC User Services  |
| tsp.1625 | Russia | Arkhangel'sk  | 1625 Arkhangelsk expfield  |                    |                  | 40,5     | 64,5833 | 26,177   | 3,2 | true  | 1927 | 1990 |  |  | 164 NSIDC User Services  |
| tsp.1626 | Russia | Arkhangel'sk  | 1626 Mudyug isl            |                    | No permafrost    | 40,2833  | 64,85   | 207,68   | 3,2 | true  | 1928 | 1961 |  |  | 164 NSIDC User Services  |
| tsp.1627 | Russia | Arkhangel'sk  | 1627 Kargopol              |                    | No permafrost    | 38,95    | 61,5    | 1        | 3,2 | true  | 1914 | 1990 |  |  | 164 NSIDC User Services  |
| tsp.1628 | Russia | Yevrey        | 1628 Birobidzhan agrepst   |                    |                  | 132,8833 | 48,7    | 73       | 3,2 | true  | 1917 | 1965 |  |  | 164 NSIDC User Services  |
| tsp.1629 | Russia | Yevrey        | 1629 Ekaterino-Nikolskaya  |                    | No permafrost    | 130,9667 | 47,7333 | 72,854   | 3,2 | true  | 1939 | 1957 |  |  | 164 NSIDC User Services  |
| tsp.1630 | Russia | Amur          | 1630 Norsk (Norskii sklad) |                    | Isolated patches | 129,9167 | 52,35   | 118,73   | 3,2 | true  | 1935 | 1965 |  |  | 164 NSIDC User Services  |
| tsp.1631 | Russia | Sverdlovsk    | 1631 Ivdel                 |                    | No permafrost    | 60,4333  | 60,6833 | 78,531   | 3,2 | true  | 1938 | 1990 |  |  | 164 NSIDC User Services  |
| tsp.1632 | Russia | Sverdlovsk    | 1632 Vysokaya Dubrava      |                    |                  | 61,0667  | 56,7333 | 279,52   | 3,2 | true  | 1938 | 1990 |  |  | 164 NSIDC User Services  |
| tsp.1633 | Russia | Kurgan        | 1633 Kurgan Voronovka      |                    |                  | 65,4     | 55,4667 | 68       | 3,2 | true  | 1943 | 1990 |  |  | 164 NSIDC User Services  |
| tsp.1634 | Russia | Chelyabinsk   | 1634 Bredy                 |                    |                  | 60,35    | 52,4333 | 315,28   | 3,2 | true  | 1931 | 1990 |  |  | 164 NSIDC User Services  |
| tsp.1635 | Russia | Perm          | 1635 Berezniki             |                    | No permafrost    | 56,6     | 59,3833 | 129      | 3,2 | true  | 1931 | 1965 |  |  | 164 NSIDC User Services  |
| tsp.1636 | Russia | Perm          | 1636 Kudymkar              |                    |                  | 54,65    | 58,9833 | 135,17   | 3,2 | true  | 1925 | 1988 |  |  | 164 NSIDC User Services  |
| tsp.1637 | Russia | Perm          | 1637 Nozhovka              |                    | No permafrost    | 54,75    | 57,0833 | 156,07   | 3,2 | true  | 1926 | 1990 |  |  | 164 NSIDC User Services  |
| tsp.1638 | Russia | Khanty-Mansi  | 1638 Saranpaul             |                    | Discontinuous    | 60,8833  | 64,2833 | 187,39   | 3,2 | true  | 1932 | 1990 |  |  | 164 NSIDC User Services  |
| tsp.1639 | Russia | Khanty-Mansi  | 1639 Berezovo              |                    | Sporadic         | 65,05    | 63,9333 | 18,452   | 3,2 | true  | 1936 | 1990 |  |  | 164 NSIDC User Services  |
| tsp.1640 | Russia | Vologda       | 1640 Velikii Ustyug        |                    |                  | 46,3     | 60,7667 | 59,045   | 3,2 | true  | 1931 | 1990 |  |  | 164 NSIDC User Services  |
| tsp.1641 | Russia | Krasnoyarsk   | 1641 Tura                  |                    | Continuous       | 100,0667 | 64,1667 | 471,37   | 3,2 | true  | 1952 | 1990 |  |  | 164 NSIDC User Services  |
| tsp.1642 | Russia | Krasnoyarsk   | 1642 Yartsevo              |                    | Isolated patches | 90,2333  | 60,25   | 52,411   | 3,2 | true  | 1952 | 1990 |  |  | 164 NSIDC User Services  |
| tsp.1643 | Russia | Khanty-Mansi  | 1643 Leushi                |                    | No permafrost    | 65,7833  | 59,6167 | 53,185   | 3,2 | true  | 1929 | 1990 |  |  | 164 NSIDC User Services  |
| tsp.1644 | Russia | Omsk          | 1644 Kalachinsk            |                    | No permafrost    | 74,5833  | 55,0333 | 103,55   | 3,2 | true  | 1950 | 1990 |  |  | 164 NSIDC User Services  |
| tsp.1645 | Russia | Vorkuta       | 1645 Eletskeya             |                    | Sporadic         | 64,1667  | 67,1667 | 151      | 3,2 | true  | 1959 | 1990 |  |  | 164 NSIDC User Services  |
| tsp.1646 | Russia | Tyumen        | 1646 Vikulovo              |                    | No permafrost    | 70,6167  | 56,8167 | 69       | 3,2 | true  | 1936 | 1990 |  |  | 164 NSIDC User Services  |
| tsp.1647 | Russia | Tyumen        | 1647 Tyumen                |                    | No permafrost    | 65,5     | 57,15   | 81,1     | 3,2 | true  | 1936 | 1990 |  |  | 164 NSIDC User Services  |
| tsp.1648 | Russia | Vologda       | 1648 Vologda Molochnoe     |                    | No permafrost    | 39,8667  | 59,2833 | 117,25   | 3,2 | true  | 1923 | 1990 |  |  | 164 NSIDC User Services  |
| tsp.1649 | Russia | Omsk          | 1649 Isil-Kul              |                    | No permafrost    | 71,2667  | 54,9    | 124      | 3,2 | true  | 1930 | 1990 |  |  | 164 NSIDC User Services  |
| tsp.1650 | Russia | Omsk          | 1650 Omsk                  |                    |                  | 73,4     | 54,9333 | 88,612   | 3,2 | true  | 1933 | 1990 |  |  | 164 NSIDC User Services  |

|          |        |              |      |                                 |                  |          |         |         |     |       |      |      |     |                     |
|----------|--------|--------------|------|---------------------------------|------------------|----------|---------|---------|-----|-------|------|------|-----|---------------------|
| tsp.1651 | Russia | Amur         | 1651 | Erofei Pavlovich                | Sporadic         | 121,9333 | 53,9667 | 473,9   | 3,2 | true  | 1924 | 1985 | 164 | NSIDC User Services |
| tsp.1652 | Russia | Krasnoyarsk  | 1652 | Turukhansk                      | Discontinuous    | 87,95    | 65,7833 | 13,625  | 3,2 | true  | 1953 | 1990 | 164 | NSIDC User Services |
| tsp.1653 | Russia | Irkutsk      | 1653 | Irkutsk obs(grass)              | Sporadic         | 104,3    | 52,2833 | 436     | 3,2 | true  | 1898 | 1990 | 164 | NSIDC User Services |
| tsp.1654 | Russia | Irkutsk      | 1654 | Erbogachen                      | Continuous       | 108,0167 | 61,2667 | 301,02  | 3,2 | true  | 1954 | 1990 | 164 | NSIDC User Services |
| tsp.1655 | Russia | Krasnoyarsk  | 1655 | Krasnoyarsk expfield            | No permafrost    | 92,8833  | 56      | 133,835 | 3,2 | true  | 1916 | 1990 | 164 | NSIDC User Services |
| tsp.1656 | Russia | Krasnoyarsk  | 1656 | Minusinsk expfield              | No permafrost    | 91,7     | 53,7    | 244,24  | 3,2 | true  | 1916 | 1990 | 164 | NSIDC User Services |
| tsp.1657 | Russia | Krasnoyarsk  | 1657 | Eniseisk                        | No permafrost    | 92,15    | 58,45   | 78,018  | 3,2 | true  | 1920 | 1990 | 164 | NSIDC User Services |
| tsp.1658 | Russia | Arkhangel'sk | 1658 | Onega                           | No permafrost    | 38,1167  | 63,9    | 9,701   | 3,2 | true  | 1952 | 1990 | 164 | NSIDC User Services |
| tsp.1659 | Russia | Tomsk        | 1659 | Kolpashev                       | No permafrost    | 82,9     | 58,3    | 62,503  | 3,2 | true  | 1934 | 1990 | 164 | NSIDC User Services |
| tsp.1660 | Russia | Tomsk        | 1660 | Tomsk                           | No permafrost    | 84,9667  | 56,4333 | 74      | 3,2 | true  | 1916 | 1990 | 164 | NSIDC User Services |
| tsp.1661 | Russia | Novosibirsk  | 1661 | Tatarsk                         | No permafrost    | 75,9667  | 55,2    | 105     | 3,2 | false | 1931 | 1990 | 164 | NSIDC User Services |
| tsp.1662 | Russia | Novosibirsk  | 1662 | Barabinsk                       | No permafrost    | 78,4     | 55,3667 | 113,092 | 3,2 | true  | 1932 | 1990 | 164 | NSIDC User Services |
| tsp.1663 | Russia | Kemerovo     | 1663 | Taiga                           | No permafrost    | 87,6167  | 56,0667 | 166,04  | 3,2 | true  | 1930 | 1990 | 164 | NSIDC User Services |
| tsp.1664 | Russia | Kemerovo     | 1664 | Kiselevsk (Afonino)             | No permafrost    | 86,65    | 54,0333 | 272,06  | 3,2 | true  | 1935 | 1990 | 164 | NSIDC User Services |
| tsp.1665 | Russia | Novosibirsk  | 1665 | Slavgorod                       | No permafrost    | 78,65    | 53,9667 | 120,68  | 3,2 | true  | 1930 | 1990 | 164 | NSIDC User Services |
| tsp.1666 | Russia | Altay        | 1666 | Rubtsovsk                       | No permafrost    | 81,2167  | 51,5    | 216,28  | 3,2 | true  | 1932 | 1990 | 164 | NSIDC User Services |
| tsp.1667 | Russia | Altay        | 1667 | Barnaul                         | No permafrost    | 83,7     | 53,3333 | 187,62  | 3,2 | true  | 1900 | 1951 | 164 | NSIDC User Services |
| tsp.1668 | Russia | Buryat       | 1668 | Tunka                           | Continuous       | 102,5333 | 51,7333 | 714,9   | 3,2 | true  | 1952 | 1990 | 164 | NSIDC User Services |
| tsp.1669 | Russia | Irkutsk      | 1669 | Shitkino                        | No permafrost    | 98,3667  | 56,3667 | 214,21  | 3,2 | true  | 1951 | 1990 | 164 | NSIDC User Services |
| tsp.1670 | Russia | Tyumen       | 1670 | Tobolsk aerologicheskaya        | No permafrost    | 68,1833  | 58,15   | 242,71  | 3,2 | true  | 1957 | 1990 | 164 | NSIDC User Services |
| tsp.1671 | Russia | Buryat       | 1671 | Tashtyp                         | Continuous       | 99,8833  | 52,8    | 187,62  | 3,2 | true  | 1931 | 1990 | 164 | NSIDC User Services |
| tsp.1672 | Russia | Komi         | 1672 | Syktyvkar 1                     | No permafrost    | 50,85    | 61,6667 | 102,932 | 3,2 | true  | 1951 | 1990 | 164 | NSIDC User Services |
| tsp.1673 | Russia | Altay        | 1673 | Barnaul agricst                 | No permafrost    | 83,7     | 53,3333 | 523,08  | 3,2 | true  | 1952 | 1990 | 164 | NSIDC User Services |
| tsp.1674 | Russia | Irkutsk      | 1674 | Bayandai                        | Isolated patches | 105,5333 | 53,1    | 692,42  | 3,2 | true  | 1913 | 1990 | 164 | NSIDC User Services |
| tsp.1675 | Russia | Komi         | 1675 | Ust-Unya                        | No permafrost    | 57,9167  | 61,8    | 292,4   | 3,2 | true  | 1950 | 1990 | 164 | NSIDC User Services |
| tsp.1676 | Russia | Irkutsk      | 1676 | Karam                           | Sporadic         | 107,5    | 55,3333 | 645,93  | 3,2 | true  | 1909 | 1990 | 164 | NSIDC User Services |
| tsp.1677 | Russia | Irkutsk      | 1677 | Zima railst                     | Isolated patches | 102,05   | 53,9333 | 456,98  | 3,2 | true  | 1954 | 1990 | 164 | NSIDC User Services |
| tsp.1678 | Russia | Yamal-Nenets | 1678 | Sidorovsk                       | Discontinuous    | 82,3333  | 66,6667 | 35,288  | 3,2 | true  | 1964 | 1990 | 164 | NSIDC User Services |
| tsp.1679 | Russia | Komi         | 1679 | Syktyvkar 2                     | No permafrost    | 50,85    | 61,6667 | 102,93  | 3,2 | true  | 1931 | 1949 | 164 | NSIDC User Services |
| tsp.1680 | Russia | Tyumen       | 1680 | Komsomolskaya                   | No permafrost    | 69,1667  | 59      | 75,922  | 3,2 | true  | 1963 | 1965 | 164 | NSIDC User Services |
| tsp.1681 | Russia | Krasnoyarsk  | 1681 | Kazachinskoe expfield           | No permafrost    | 93,1833  | 57,75   | 131,79  | 3,2 | true  | 1916 | 1990 | 164 | NSIDC User Services |
| tsp.1682 | Russia | Krasnoyarsk  | 1682 | Solyanka                        | No permafrost    | 95,2667  | 56,1667 | 40      | 3,2 | true  | 1931 | 1990 | 164 | NSIDC User Services |
| tsp.1683 | Russia | Novosibirsk  | 1683 | Ogurtsovo                       | No permafrost    | 83       | 55,0833 | 173,14  | 3,2 | true  | 1958 | 1990 | 164 | NSIDC User Services |
| tsp.1684 | Russia | Tomsk        | 1684 | Srednii Vasyugan (Vasyuganskoe) | No permafrost    | 78,2333  | 59,2167 | 65,548  | 3,2 | true  | 1927 | 1990 | 164 | NSIDC User Services |
| tsp.1685 | Russia | Irkutsk      | 1685 | Khomutovo                       | No permafrost    | 104,333  | 52,5    | 453,337 | 3,2 | true  | 1956 | 1990 | 164 | NSIDC User Services |
| tsp.1686 | Russia | Irkutsk      | 1686 | Tulun agro                      | Isolated patches | 100,633  | 54,6    | 509,98  | 3,2 | true  | 1951 | 1990 | 164 | NSIDC User Services |
| tsp.1687 | Russia | Amur         | 1687 | Tolstovka (Amurskaya agrexpt)   | No permafrost    | 127,916  | 50,1667 | 155,73  | 3,2 | true  | 1951 | 1990 | 164 | NSIDC User Services |
| tsp.1688 | Russia | Khbarovsk    | 1688 | Khbarovsk                       | No permafrost    | 135,166  | 48,5167 | 63,974  | 3,2 | true  | 1913 | 1965 | 164 | NSIDC User Services |
| tsp.1689 | Russia | Khbarovsk    | 1689 | Vyazemskaya                     | No permafrost    | 134,8167 | 47,55   | 83,62   | 3,2 | true  | 1941 | 1990 | 164 | NSIDC User Services |
| tsp.1690 | Russia | Khbarovsk    | 1690 | Poliny Osipenko                 | Sporadic         | 136,5    | 52,4167 | 69,922  | 3,2 | true  | 1913 | 1990 | 164 | NSIDC User Services |
| tsp.1691 | Russia | Amur         | 1691 | Dambuki                         | Continuous       | 127,6333 | 54,3333 | 332,83  | 3,2 | true  | 1912 | 1965 | 164 | NSIDC User Services |
| tsp.1692 | Russia | Amur         | 1692 | Pikan                           | Sporadic         | 127,2333 | 53,7167 | 224,65  | 3,2 | true  | 1915 | 1965 | 164 | NSIDC User Services |
| tsp.1693 | Russia | Khbarovsk    | 1693 | Komsomolsk-na-Amure             | Sporadic         | 137,0333 | 51,0833 | 39,755  | 3,2 | true  | 1935 | 1990 | 164 | NSIDC User Services |
| tsp.1694 | Russia | Khbarovsk    | 1694 | Bikin                           | No permafrost    | 134,2667 | 46,8    | 64,369  | 3,2 | true  | 1913 | 1990 | 164 | NSIDC User Services |
| tsp.1695 | Russia | Irkutsk      | 1695 | Irkutsk obs (bare soil)         | Sporadic         | 104,3    | 52,2833 | 334,23  | 3,2 | true  | 1891 | 1970 | 164 | NSIDC User Services |
| tsp.1696 | Russia | Amur         | 1696 | Bomnak                          | Discontinuous    | 128,9333 | 54,7167 | 436     | 3,2 | true  | 1909 | 1990 | 164 | NSIDC User Services |
| tsp.1697 | Russia | Kurgan       | 1697 | Makushino                       | No permafrost    | 67,3     | 55,25   | 134,48  | 3,2 | true  | 1930 | 1990 | 164 | NSIDC User Services |
| tsp.1698 | Russia | Komi         | 1698 | Troitsko-Pechorskoe             | No permafrost    | 56,2     | 62,7    | 107     | 3,2 | true  | 1953 | 1990 | 164 | NSIDC User Services |
| tsp.1699 | Russia | Komi         | 1699 | Ust-Tsilma                      | No permafrost    | 52,1667  | 65,45   | 161,46  | 3,2 | true  | 1951 | 1990 | 164 | NSIDC User Services |
| tsp.1700 | Russia | Arkhangel'sk | 1700 | Konosha                         | No permafrost    | 40,1667  | 61      | 218,85  | 3,2 | true  | 1951 | 1990 | 164 | NSIDC User Services |
| tsp.1701 | Russia | Vorkuta      | 1701 | Khosedo-Khard                   | Discontinuous    | 59,3833  | 67,0833 | 135,41  | 3,2 | true  | 1953 | 1990 | 164 | NSIDC User Services |
| tsp.1702 | Russia | Khakass      | 1702 | Khakasskaya                     | No permafrost    | 91,3333  | 53,8333 | 256,23  | 3,2 | true  | 1940 | 1990 | 164 | NSIDC User Services |
| tsp.1703 | Russia | Tuva         | 1703 | Kyzyl                           | No permafrost    | 94,5     | 51,6667 | 697,38  | 3,2 | true  | 1951 | 1990 | 164 | NSIDC User Services |
| tsp.1704 | Russia | Krasnoyarsk  | 1704 | Boguchany                       | Isolated patches | 97,4     | 58,4167 | 133,912 | 3,2 | true  | 1952 | 1990 | 164 | NSIDC User Services |
| tsp.1705 | Russia | Altay        | 1705 | Rodino                          | No permafrost    | 80,2     | 52,5    | 12,577  | 3,2 | true  | 1950 | 1990 | 164 | NSIDC User Services |
| tsp.1706 | Russia | Khbarovsk    | 1706 | Sovetskaya Gavan                | No permafrost    | 140,2833 | 48,9667 | 54,024  | 3,2 | true  | 1936 | 1965 | 164 | NSIDC User Services |
| tsp.1707 | Russia | Gorno-Altay  | 1707 | Kosh-Agach                      | Discontinuous    | 88,6833  | 50,0167 | 763,76  | 3,2 | true  | 1935 | 1990 | 164 | NSIDC User Services |
| tsp.1708 | Russia | Chukotka     | 1708 | Dionisiy-22                     | Continuous       | 177,4185 | 64,5926 | 45,065  | 20  | true  | 1987 | 2019 | 81  | Mikhail Zheleznyak  |
| tsp.1710 | Russia | Chukotka     | 1710 | Dionisiy-111(2)                 | Continuous       | 177,3997 | 64,6033 | 45,8005 | 20  | true  | 1987 | 2017 | 81  | Mikhail Zheleznyak  |
| tsp.1721 | Russia | Tiksi        | 1721 | Buor Khaya                      | Continuous       | 132,1106 | 71,4203 | 25      | 18  | false |      |      | 85  | Paul Overduin       |

|          |        |               |                      |                |               |          |         |          |      |       |      |  |      |  |  |  |  |                           |
|----------|--------|---------------|----------------------|----------------|---------------|----------|---------|----------|------|-------|------|--|------|--|--|--|--|---------------------------|
| tsp.1748 | Russia | Novyi Urengoy | 1748 Urengoy 15-03   |                | Continuous    | 76,6922  | 67,474  | 7        | 10   | false |      |  |      |  |  |  |  | 75 Dmitry S. Drozdov      |
| tsp.1772 | Russia | Cherskii      | 1772 1_12            | RU 162 06_0029 | Continuous    | 161,3838 | 68,7448 | 67,3082  | 15   | false |      |  |      |  |  |  |  | 79 Alexander L. Kholodov  |
| tsp.1773 | Russia | Cherskii      | 1773 2_12            | RU 163 06_0021 | Continuous    | 161,4993 | 68,5133 | 3,4037   | 13   | false |      |  |      |  |  |  |  | 79 Alexander L. Kholodov  |
| tsp.1774 | Russia | Cherskii      | 1774 1_13            | RU 164 06_0022 | Continuous    | 161,4935 | 68,5116 | 7,3899   | 15   | false |      |  |      |  |  |  |  | 79 Alexander L. Kholodov  |
| tsp.1775 | Russia | Cherskii      | 1775 2_13            | RU 165 06_0023 | Continuous    | 161,3881 | 68,7462 | 67,6936  | 15   | false |      |  |      |  |  |  |  | 79 Alexander L. Kholodov  |
| tsp.1776 | Russia | Cherskii      | 1776 3_13            | RU 166 06_0024 | Continuous    | 161,3498 | 68,6134 | 4,5089   | 22   | false |      |  |      |  |  |  |  | 79 Alexander L. Kholodov  |
| tsp.1777 | Russia | Vaskiny Dachy | 1777 CALM_10_m       | RU 03_005      | Continuous    | 68,8913  | 70,2811 | 54       | 10   | false |      |  |      |  |  |  |  | 124 Artem Khomutov        |
| tsp.1778 | Russia | Vaskiny Dachy | 1778 AGG2            | RU 03_005      | Continuous    | 68,93    | 70,2929 | 54       | 0,8  | false |      |  |      |  |  |  |  | 124 Artem Khomutov        |
| tsp.1827 | Russia | Bolvansky     | 1827 Shapkina 04     |                | Continuous    | 55,1568  | 67,5777 | 93,0151  | 20   | true  | 2014 |  | 2015 |  |  |  |  | 78 Galina Malkova         |
| tsp.1828 | Russia | Bolvansky     | 1828 Shapkina 08     |                | Continuous    | 55,1453  | 67,5772 | 94,4306  | 12   | true  | 2014 |  | 2016 |  |  |  |  | 78 Galina Malkova         |
| tsp.1829 | Russia | Bolvansky     | 1829 Kashin 01k      |                | Continuous    | 53,8528  | 68,2433 | 3,1697   | 6    | true  | 2010 |  | 2016 |  |  |  |  | 78 Galina Malkova         |
| tsp.1830 | Russia | Bolvansky     | 1830 Shapkina 09     |                | Continuous    | 55,1331  | 67,5767 | 94,3237  | 20   | true  | 2014 |  | 2016 |  |  |  |  | 78 Galina Malkova         |
| tsp.1831 | Russia | Bolvansky     | 1831 Shapkina 12     |                | Continuous    | 55,1228  | 67,5764 | 87,953   | 12   | true  | 2014 |  | 2016 |  |  |  |  | 78 Galina Malkova         |
| tsp.1832 | Russia | Bolvansky     | 1832 Kashin 02k      |                | Continuous    | 53,8633  | 68,2472 | 1        | 10   | true  | 2012 |  | 2016 |  |  |  |  | 78 Galina Malkova         |
| tsp.1833 | Russia | Marre Sale    | 1833 Marre Sale 6    |                | Unknown       | 66,8125  | 69,7164 | 0        | 10   | true  | 2015 |  | 2016 |  |  |  |  | 103 Alexander A. Vasiliev |
| tsp.1835 | Russia | Chara         | 1835 Belenkiy-3      |                | Continuous    | 118,1897 | 56,7608 | 726,5666 | 0,65 | true  | 2015 |  | 2019 |  |  |  |  | 14 Dmitry Sergueev        |
| tsp.1840 | Russia | Olkhon        | 1840 Olkhon-1        |                | Sporadic      | 107,4402 | 53,2303 | 473      | 8    | true  | 2015 |  | 2018 |  |  |  |  | 156 Elena Kozireva        |
| tsp.1841 | Russia | Khanovey      | 1841 Khanovey-7      |                | Discontinuous | 63,6584  | 67,291  | 92       | 2,9  | true  | 2017 |  | 2021 |  |  |  |  | 167 Vladislav Isaev       |
| tsp.1846 | Russia | Magadan       | 1846 Armansky pass-4 |                | Discontinuous | 0        | 0       |          | 200  | true  | 2017 |  | 2019 |  |  |  |  | 150 Sergey Guliy          |
| tsp.1857 | Russia | Chara         | 1857 Belenkiy-4      |                | Continuous    | 118,2046 | 56,7635 | 727      | 0,25 | true  | 2015 |  | 2022 |  |  |  |  | 14 Dmitry Sergueev        |
| tsp.1858 | Russia | Chara         | 1858 Erkhov-1        |                | Continuous    | 118,3757 | 56,6621 | 1472     | 11,3 | true  | 2018 |  | 2022 |  |  |  |  | 14 Dmitry Sergueev        |
| tsp.1860 | Russia | Khanovey      | 1860 Khanovey-8      |                | Discontinuous | -18,1076 | 65,6748 |          | 3,3  | true  | 2019 |  | 2021 |  |  |  |  | 167 Vladislav Isaev       |



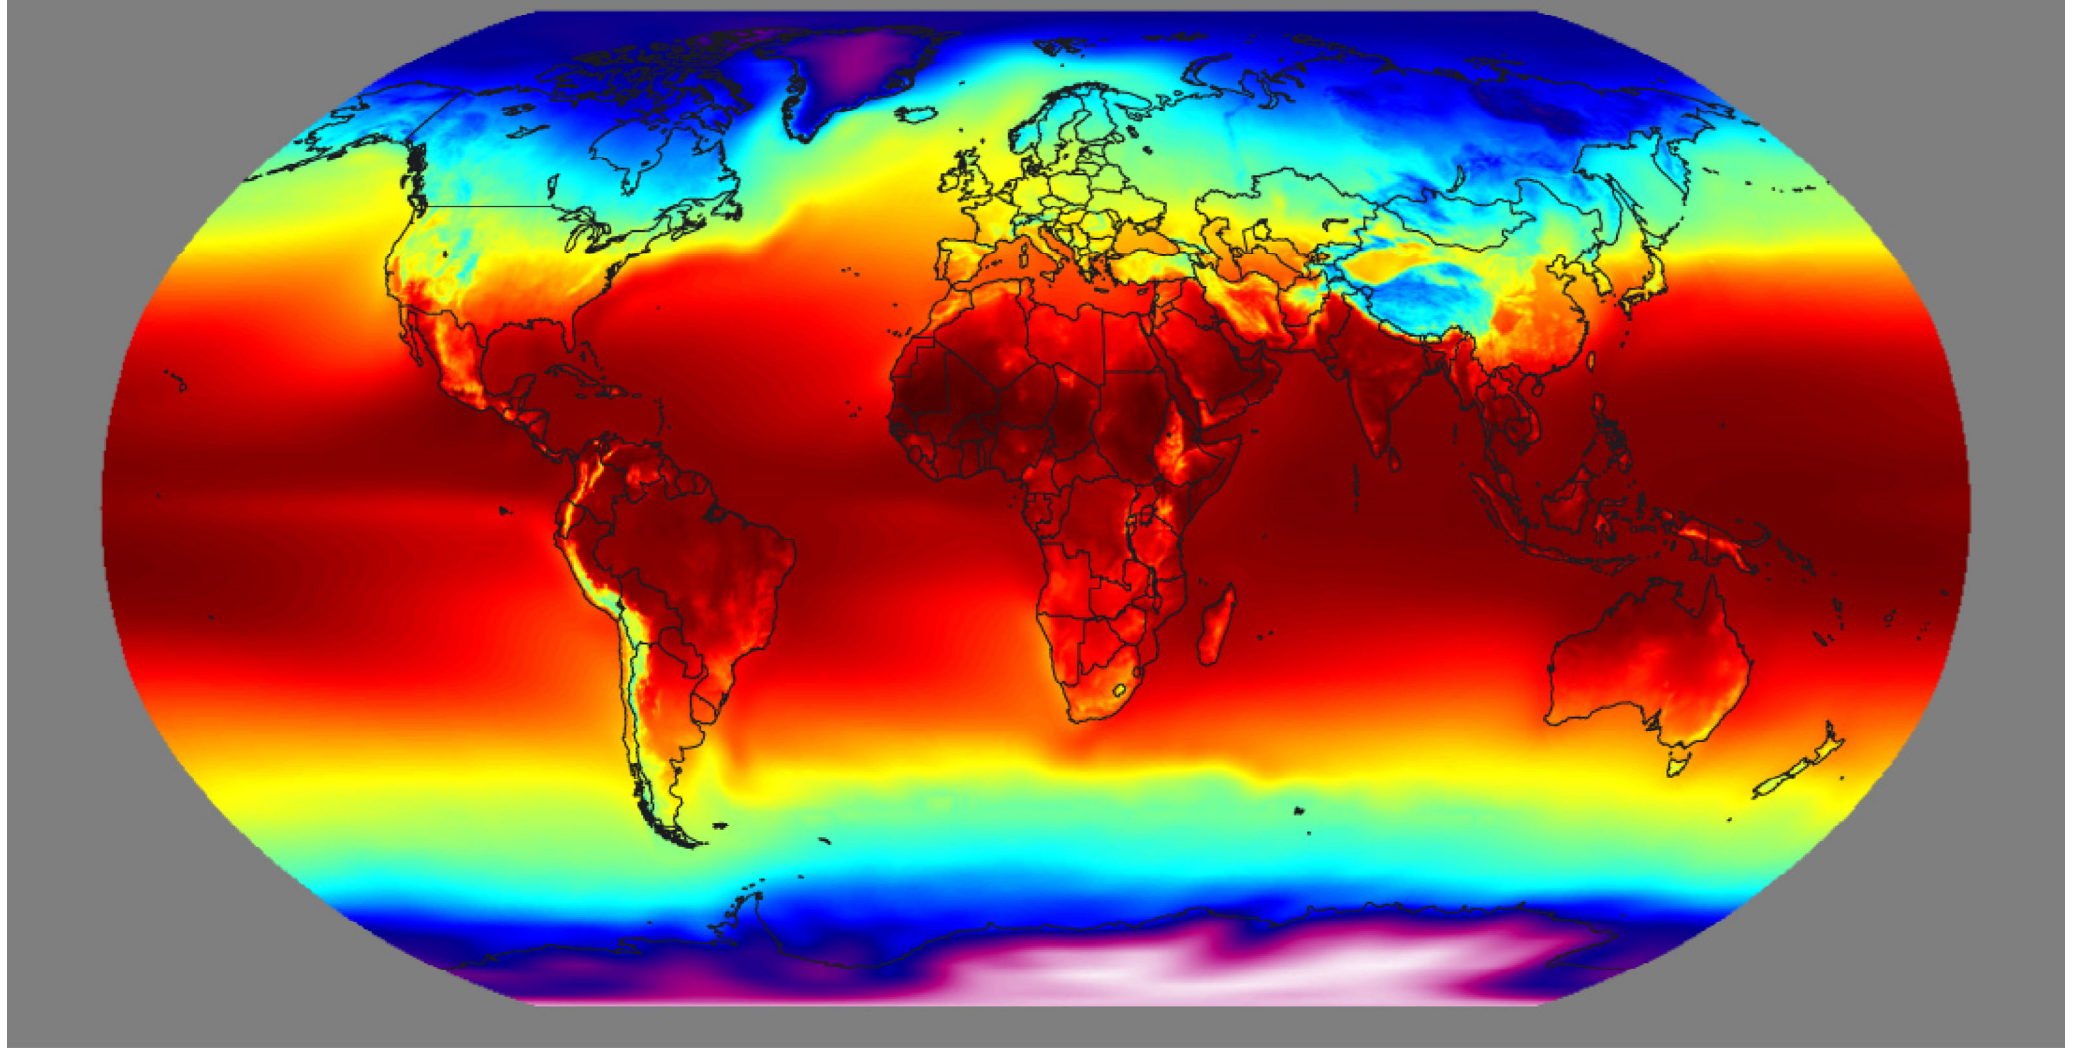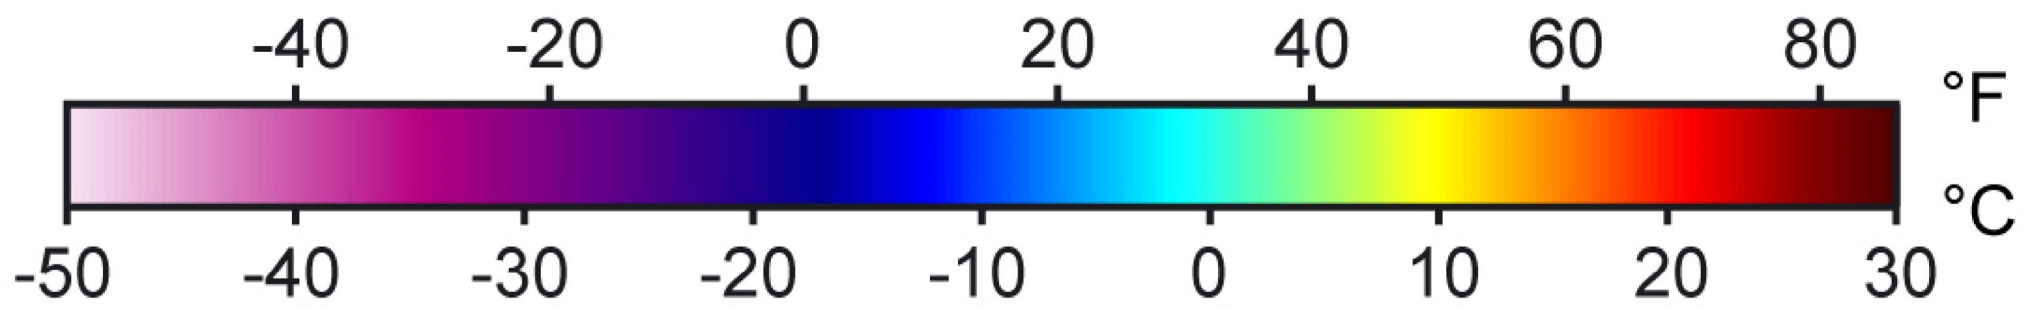

**Annual Mean Temperature**
